# Supplementary material for: Microbiome diversity in raw milk from Comisana and Lacaune sheep and microbial evolution during artisanal Pecorino-like cheese
Source: Preprints.org preprint supplement (doi:10.20944/preprints202404.1108.v1), 2024-04-17
Supplement: Supplementary file 1 [file supplementary]

## Sheet: Table S1
Table S1. Summary of NGS data used in this study.
Sheep breed	Sample	Raw reads	Trimmed reads	Relative percentage (%)	n° OTU*
CSB	Milk_1	46.893	18.085	61.43	50
	Milk_2	32.608	12.024	63.13
	Curd_1	28.584	8.741	69.42	207
	Curd_2	43.243	14.347	66.82
	Cheese_1	56.259	23.568	58.11	19
	Cheese_2	55.608	23.224	58.24
LSB	Milk_1	50.572	17.175	66.04	66
	Milk_2	53.631	18.613	65.29
	Curd_1	49.394	9.136	81.50	165
	Curd_2	34.064	4.888	85.65
	Cheese_1	39.464	12.909	67.29	54
	Cheese_2	54.028	18.053	66.59
CSB = Comisana sheep breed		LSB = Lacaune sheeep breed
*For the microbiome definition, the OTU data obtained from the replicate samples were combined and used to describe the most abundant bacteria in raw milk, curd and cheese samples.

## Sheet: Table S2
Table S2. CBS and LSB milk, curd and cheese microbiome.
OTUs ID	Taxonomy							OTUs %
	Kindom	Phylum	Class	Order	Family	Genus	Species	CSB_Mi	CSB_Cu	CSB_Ch	LSB_Mi	LSB_Cu	LSB_Ch
1	k__Bacteria	__	__	__	__	__	__	0.22	0.34	0.03	0.28	0.79	0.09
2	k__Bacteria	p__Acidobacteria	c__Acidobacteria-6	o__iii1-15	f__	g__	s__	0	0	0	0	0	0
3	k__Bacteria	p__Acidobacteria	c__DA052	o__Ellin6513	f__	g__	s__	0.01	0	0	0	0	0
4	k__Bacteria	p__Acidobacteria	c__Solibacteres	o__Solibacterales	f__	g__	s__	0.03	0	0	0	0	0
5	k__Bacteria	p__Acidobacteria	c__[Chloracidobacteria]	o__RB41	f__Ellin6075	g__	s__	0	0.1	0	0	0	0
6	k__Bacteria	p__Actinobacteria	c__Acidimicrobiia	o__Acidimicrobiales	f__Microthrixaceae	g__	s__	0	0.01	0	0	0	0
7	k__Bacteria	p__Actinobacteria	c__Actinobacteria	o__Actinomycetales	__	__	__	0	0.03	0	0	0	0
8	k__Bacteria	p__Actinobacteria	c__Actinobacteria	o__Actinomycetales	f__	g__	s__	0	0	0	0	0	0
9	k__Bacteria	p__Actinobacteria	c__Actinobacteria	o__Actinomycetales	f__Actinomycetaceae	g__	s__	0	0.05	0	0	0	0
10	k__Bacteria	p__Actinobacteria	c__Actinobacteria	o__Actinomycetales	f__Actinomycetaceae	g__N09	s__	0	0.01	0	0	0	0
11	k__Bacteria	p__Actinobacteria	c__Actinobacteria	o__Actinomycetales	f__Actinomycetaceae	g__Trueperella	s__	0	0	0	0	0	0
12	k__Bacteria	p__Actinobacteria	c__Actinobacteria	o__Actinomycetales	f__Brevibacteriaceae	g__Brevibacterium	__	0	0	0	0.01	0.01	0.01
13	k__Bacteria	p__Actinobacteria	c__Actinobacteria	o__Actinomycetales	f__Brevibacteriaceae	g__Brevibacterium	s__	0	0.02	0	0	0.02	0
14	k__Bacteria	p__Actinobacteria	c__Actinobacteria	o__Actinomycetales	f__Corynebacteriaceae	g__Corynebacterium	s__	0.12	0.53	0	0.02	0.06	0
15	k__Bacteria	p__Actinobacteria	c__Actinobacteria	o__Actinomycetales	f__Corynebacteriaceae	g__Corynebacterium	s__stationis	0	0	0	0.03	0.12	0
16	k__Bacteria	p__Actinobacteria	c__Actinobacteria	o__Actinomycetales	f__Dermabacteraceae	__	__	0	0	0	0	0	0.01
17	k__Bacteria	p__Actinobacteria	c__Actinobacteria	o__Actinomycetales	f__Dietziaceae	g__Dietzia	s__	0	0	0	0	0.04	0
18	k__Bacteria	p__Actinobacteria	c__Actinobacteria	o__Actinomycetales	f__Intrasporangiaceae	g__Arsenicicoccus	s__piscis	0	0	0	0	0.01	0
19	k__Bacteria	p__Actinobacteria	c__Actinobacteria	o__Actinomycetales	f__Microbacteriaceae	g__Leucobacter	s__	0	0.08	0	0	0	0
20	k__Bacteria	p__Actinobacteria	c__Actinobacteria	o__Actinomycetales	f__Microbacteriaceae	g__Microbacterium	__	0.04	0	0	0.01	0	0
21	k__Bacteria	p__Actinobacteria	c__Actinobacteria	o__Actinomycetales	f__Microbacteriaceae	g__Microbacterium	s__lacticum	0	0.1	0	0	0	0
22	k__Bacteria	p__Actinobacteria	c__Actinobacteria	o__Actinomycetales	f__Micrococcaceae	g__Arthrobacter	__	0	0.12	0	0	0	0
23	k__Bacteria	p__Actinobacteria	c__Actinobacteria	o__Actinomycetales	f__Micrococcaceae	g__Kocuria	__	0	0	0	0	0.05	0.01
24	k__Bacteria	p__Actinobacteria	c__Actinobacteria	o__Actinomycetales	f__Micrococcaceae	g__Rothia	__	0	0	0	0	0	0.02
25	k__Bacteria	p__Actinobacteria	c__Actinobacteria	o__Actinomycetales	f__Micrococcaceae	g__Rothia	s__nasimurium	0	0	0	0.01	0.09	0.03
26	k__Bacteria	p__Actinobacteria	c__Actinobacteria	o__Actinomycetales	f__Mycobacteriaceae	g__Mycobacterium	s__	0.04	0	0	0.01	0	0
27	k__Bacteria	p__Actinobacteria	c__Actinobacteria	o__Actinomycetales	f__Nocardioidaceae	__	__	0	0.01	0	0	0	0
28	k__Bacteria	p__Actinobacteria	c__Actinobacteria	o__Actinomycetales	f__Nocardioidaceae	g__Aeromicrobium	s__	0	0.01	0	0	0	0
29	k__Bacteria	p__Actinobacteria	c__Actinobacteria	o__Actinomycetales	f__Nocardioidaceae	g__Propionicimonas	s__	0	0.17	0	0	0	0
30	k__Bacteria	p__Actinobacteria	c__Actinobacteria	o__Actinomycetales	f__Promicromonosporaceae	g__	s__	0	0.01	0	0	0	0
31	k__Bacteria	p__Actinobacteria	c__Actinobacteria	o__Actinomycetales	f__Propionibacteriaceae	g__Propionibacterium	s__acnes	0	0.01	0	0	0	0
32	k__Bacteria	p__Actinobacteria	c__Actinobacteria	o__Actinomycetales	f__Propionibacteriaceae	g__Tessaracoccus	s__	0	0.06	0	0	0	0
33	k__Bacteria	p__Actinobacteria	c__Actinobacteria	o__Actinomycetales	f__Yaniellaceae	g__Yaniella	s__	0	0.05	0	0.01	0	0
34	k__Bacteria	p__Actinobacteria	c__Actinobacteria	o__Bifidobacteriales	f__Bifidobacteriaceae	g__	s__	0	0	0.03	0	0.33	0.38
35	k__Bacteria	p__Actinobacteria	c__Actinobacteria	o__Bifidobacteriales	f__Bifidobacteriaceae	g__Bifidobacterium	s__adolescentis	0	0.01	0	0	0	0
36	k__Bacteria	p__Actinobacteria	c__Coriobacteriia	o__Coriobacteriales	f__Coriobacteriaceae	g__Atopobium	s__	0	0	0	0	0.01	0
37	k__Bacteria	p__Actinobacteria	c__Coriobacteriia	o__Coriobacteriales	f__Coriobacteriaceae	g__Olsenella	s__umbonata	0.01	0	0	0	0.09	0
38	k__Bacteria	p__Armatimonadetes	c__Armatimonadia	o__Armatimonadales	f__Armatimonadaceae	g__	s__	0	0.01	0	0	0	0
39	k__Bacteria	p__Bacteroidetes	__	__	__	__	__	0	0.01	0	0.02	0	0
40	k__Bacteria	p__Bacteroidetes	c__Bacteroidia	o__Bacteroidales	__	__	__	0	0.01	0	0	0	0
41	k__Bacteria	p__Bacteroidetes	c__Bacteroidia	o__Bacteroidales	f__	g__	s__	0.01	0.22	0	0	0.1	0
42	k__Bacteria	p__Bacteroidetes	c__Bacteroidia	o__Bacteroidales	f__BS11	g__	s__	0	0	0	0	0.01	0
43	k__Bacteria	p__Bacteroidetes	c__Bacteroidia	o__Bacteroidales	f__Bacteroidaceae	g__5-7N15	s__	0.02	0.19	0	0	0.01	0
44	k__Bacteria	p__Bacteroidetes	c__Bacteroidia	o__Bacteroidales	f__Bacteroidaceae	g__	s__	0	0.03	0	0	0	0
45	k__Bacteria	p__Bacteroidetes	c__Bacteroidia	o__Bacteroidales	f__Bacteroidaceae	g__Bacteroides	__	0	0.01	0	0	0	0
46	k__Bacteria	p__Bacteroidetes	c__Bacteroidia	o__Bacteroidales	f__Bacteroidaceae	g__Bacteroides	s__	0.01	0.01	0	0	0.03	0
47	k__Bacteria	p__Bacteroidetes	c__Bacteroidia	o__Bacteroidales	f__Bacteroidaceae	g__Bacteroides	s__acidifaciens	0	0	0	0	0.05	0
48	k__Bacteria	p__Bacteroidetes	c__Bacteroidia	o__Bacteroidales	f__GZKB119	g__	s__	0	0.02	0	0	0	0
49	k__Bacteria	p__Bacteroidetes	c__Bacteroidia	o__Bacteroidales	f__ML635J-40	g__	s__	0	0.01	0	0	0	0
50	k__Bacteria	p__Bacteroidetes	c__Bacteroidia	o__Bacteroidales	f__Marinilabiaceae	g__	s__	0	0.04	0	0	0	0
51	k__Bacteria	p__Bacteroidetes	c__Bacteroidia	o__Bacteroidales	f__Porphyromonadaceae	g__	s__	0	0.69	0	0	0	0
52	k__Bacteria	p__Bacteroidetes	c__Bacteroidia	o__Bacteroidales	f__Porphyromonadaceae	g__Paludibacter	s__	0	0.08	0	0	0	0
53	k__Bacteria	p__Bacteroidetes	c__Bacteroidia	o__Bacteroidales	f__Porphyromonadaceae	g__Parabacteroides	s__distasonis	0	0.01	0	0	0	0
54	k__Bacteria	p__Bacteroidetes	c__Bacteroidia	o__Bacteroidales	f__Porphyromonadaceae	g__Porphyromonas	s__	0	0.01	0	0	0.03	0
55	k__Bacteria	p__Bacteroidetes	c__Bacteroidia	o__Bacteroidales	f__Porphyromonadaceae	g__Porphyromonas	s__endodontalis	0	0.01	0	0	0	0
56	k__Bacteria	p__Bacteroidetes	c__Bacteroidia	o__Bacteroidales	f__Prevotellaceae	g__Prevotella	s__	0	0.05	0	0	0.2	0
57	k__Bacteria	p__Bacteroidetes	c__Bacteroidia	o__Bacteroidales	f__Prevotellaceae	g__Prevotella	s__copri	0	0.02	0	0	0	0
58	k__Bacteria	p__Bacteroidetes	c__Bacteroidia	o__Bacteroidales	f__Prevotellaceae	g__Prevotella	s__ruminicola	0	0	0	0	0.02	0
59	k__Bacteria	p__Bacteroidetes	c__Bacteroidia	o__Bacteroidales	f__RF16	g__	s__	0.01	0.1	0	0	0	0
60	k__Bacteria	p__Bacteroidetes	c__Bacteroidia	o__Bacteroidales	f__Rikenellaceae	g__	s__	0	0.06	0	0	0	0
61	k__Bacteria	p__Bacteroidetes	c__Bacteroidia	o__Bacteroidales	f__S24-7	g__	s__	0	0.01	0	0	0.06	0
62	k__Bacteria	p__Bacteroidetes	c__Bacteroidia	o__Bacteroidales	f__[Barnesiellaceae]	g__	s__	0	0.01	0	0	0	0
63	k__Bacteria	p__Bacteroidetes	c__Bacteroidia	o__Bacteroidales	f__[Odoribacteraceae]	g__Odoribacter	s__	0	0	0	0	0	0
64	k__Bacteria	p__Bacteroidetes	c__Bacteroidia	o__Bacteroidales	f__[Paraprevotellaceae]	g__	s__	0	0.02	0	0	0	0
65	k__Bacteria	p__Bacteroidetes	c__Bacteroidia	o__Bacteroidales	f__[Paraprevotellaceae]	g__CF231	s__	0	0.14	0	0	0	0
66	k__Bacteria	p__Bacteroidetes	c__Bacteroidia	o__Bacteroidales	f__[Paraprevotellaceae]	g__YRC22	s__	0	0.01	0	0	0	0
67	k__Bacteria	p__Bacteroidetes	c__Bacteroidia	o__Bacteroidales	f__[Paraprevotellaceae]	g__[Prevotella]	s__	0	0.01	0	0	0	0
68	k__Bacteria	p__Bacteroidetes	c__Bacteroidia	o__Bacteroidales	f__p-2534-18B5	g__	s__	0	0.08	0	0	0	0
69	k__Bacteria	p__Bacteroidetes	c__Cytophagia	o__Cytophagales	f__Cytophagaceae	__	__	0	0	0	0	0	0
70	k__Bacteria	p__Bacteroidetes	c__Cytophagia	o__Cytophagales	f__Cytophagaceae	g__Hymenobacter	s__	0	0	0	0.01	0	0
71	k__Bacteria	p__Bacteroidetes	c__Cytophagia	o__Cytophagales	f__Cytophagaceae	g__Spirosoma	s__	0.01	0	0	0.03	0	0
72	k__Bacteria	p__Bacteroidetes	c__Flavobacteriia	o__Flavobacteriales	__	__	__	0	0	0	0	0	0.01
73	k__Bacteria	p__Bacteroidetes	c__Flavobacteriia	o__Flavobacteriales	f__Cryomorphaceae	g__Brumimicrobium	s__	0	0.05	0	0	0	0
74	k__Bacteria	p__Bacteroidetes	c__Flavobacteriia	o__Flavobacteriales	f__Cryomorphaceae	g__Fluviicola	s__	0	0.01	0	0	0	0
75	k__Bacteria	p__Bacteroidetes	c__Flavobacteriia	o__Flavobacteriales	f__Flavobacteriaceae	__	__	0	0.05	0	0	0.02	0
76	k__Bacteria	p__Bacteroidetes	c__Flavobacteriia	o__Flavobacteriales	f__Flavobacteriaceae	g__	s__	0	0.19	0	0	0	0
77	k__Bacteria	p__Bacteroidetes	c__Flavobacteriia	o__Flavobacteriales	f__Flavobacteriaceae	g__Flavobacterium	__	0	0	0	0	0.03	0
78	k__Bacteria	p__Bacteroidetes	c__Flavobacteriia	o__Flavobacteriales	f__Flavobacteriaceae	g__Flavobacterium	s__	0	0.01	0	0	0.03	0
79	k__Bacteria	p__Bacteroidetes	c__Flavobacteriia	o__Flavobacteriales	f__Flavobacteriaceae	g__Flavobacterium	s__frigidarium	0	0	0	0	37.62	0.33
80	k__Bacteria	p__Bacteroidetes	c__Flavobacteriia	o__Flavobacteriales	f__Flavobacteriaceae	g__Flavobacterium	s__succinicans	0	0.05	0	0	0	0
81	k__Bacteria	p__Bacteroidetes	c__Flavobacteriia	o__Flavobacteriales	f__Flavobacteriaceae	g__Myroides	s__	0	0	0	0	0.02	0
82	k__Bacteria	p__Bacteroidetes	c__Flavobacteriia	o__Flavobacteriales	f__[Weeksellaceae]	g__Chryseobacterium	s__	0	0.23	0	0	2.37	0.16
83	k__Bacteria	p__Bacteroidetes	c__Flavobacteriia	o__Flavobacteriales	f__[Weeksellaceae]	g__Ornithobacterium	s__	0	0.02	0	0	0	0
84	k__Bacteria	p__Bacteroidetes	c__Flavobacteriia	o__Flavobacteriales	f__[Weeksellaceae]	g__Wautersiella	s__	0	0.01	0	0	1.16	0.18
85	k__Bacteria	p__Bacteroidetes	c__Sphingobacteriia	o__Sphingobacteriales	f__Sphingobacteriaceae	__	__	0	0.01	0	0	0	0
86	k__Bacteria	p__Bacteroidetes	c__Sphingobacteriia	o__Sphingobacteriales	f__Sphingobacteriaceae	g__	s__	0	0.06	0	0	0.01	0
87	k__Bacteria	p__Bacteroidetes	c__Sphingobacteriia	o__Sphingobacteriales	f__Sphingobacteriaceae	g__Pedobacter	s__	0.95	0	0	0	0.05	0
88	k__Bacteria	p__Bacteroidetes	c__Sphingobacteriia	o__Sphingobacteriales	f__Sphingobacteriaceae	g__Sphingobacterium	s__	0	0	0	0	0.06	0
89	k__Bacteria	p__Bacteroidetes	c__Sphingobacteriia	o__Sphingobacteriales	f__Sphingobacteriaceae	g__Sphingobacterium	s__faecium	0	0.6	0	0	0.05	0
90	k__Bacteria	p__Bacteroidetes	c__Sphingobacteriia	o__Sphingobacteriales	f__Sphingobacteriaceae	g__Sphingobacterium	s__multivorum	0	0	0	0	0.25	0
91	k__Bacteria	p__Bacteroidetes	c__[Saprospirae]	o__[Saprospirales]	__	__	__	0	0.01	0	0	0	0
92	k__Bacteria	p__Bacteroidetes	c__[Saprospirae]	o__[Saprospirales]	f__	g__	s__	0	0	0	0	0	0
93	k__Bacteria	p__Bacteroidetes	c__[Saprospirae]	o__[Saprospirales]	f__Chitinophagaceae	g__	s__	0	0	0	0	0.03	0
94	k__Bacteria	p__Bacteroidetes	c__[Saprospirae]	o__[Saprospirales]	f__Chitinophagaceae	g__Flavisolibacter	s__	0	0	0	0	0	0
95	k__Bacteria	p__Bacteroidetes	c__[Saprospirae]	o__[Saprospirales]	f__Saprospiraceae	g__	s__	0	0.03	0	0	0	0
96	k__Bacteria	p__Chloroflexi	c__C0119	o__	f__	g__	s__	0	0	0	0.01	0	0
97	k__Bacteria	p__Chloroflexi	c__Chloroflexi	o__[Roseiflexales]	f__	g__	s__	0	0	0	0	0	0
98	k__Bacteria	p__Chloroflexi	c__Thermomicrobia	o__AKYG1722	f__	g__	s__	0	0	0	0	0	0
99	k__Bacteria	p__Chloroflexi	c__Thermomicrobia	o__JG30-KF-CM45	f__	g__	s__	0	0.01	0	0	0.01	0
100	k__Bacteria	p__Cyanobacteria	c__4C0d-2	o__YS2	f__	g__	s__	0	0.02	0	0	0	0
101	k__Bacteria	p__Cyanobacteria	c__Chloroplast	__	__	__	__	0	0	0	0	0	0
102	k__Bacteria	p__Cyanobacteria	c__Chloroplast	o__	f__	g__	s__	0	0	0	0	0.02	0
103	k__Bacteria	p__Cyanobacteria	c__Chloroplast	o__Stramenopiles	f__	g__	s__	0	0.05	0	0	0.01	0
104	k__Bacteria	p__Cyanobacteria	c__Chloroplast	o__Streptophyta	f__	g__	s__	0.02	0.04	0.01	0	0	0
105	k__Bacteria	p__Fibrobacteres	c__Fibrobacteria	o__Fibrobacterales	f__Fibrobacteraceae	g__Fibrobacter	s__succinogenes	0	0.03	0	0	0	0
106	k__Bacteria	p__Firmicutes	c__Bacilli	__	__	__	__	0	0.02	0	0	0	0
107	k__Bacteria	p__Firmicutes	c__Bacilli	o__Bacillales	f__Bacillaceae	__	__	0	0.01	0	0	0	0
108	k__Bacteria	p__Firmicutes	c__Bacilli	o__Bacillales	f__Bacillaceae	g__Anoxybacillus	s__kestanbolensis	0	0.02	0	0.11	0	0
109	k__Bacteria	p__Firmicutes	c__Bacilli	o__Bacillales	f__Bacillaceae	g__Bacillus	__	0	0	0	0.24	0	0
110	k__Bacteria	p__Firmicutes	c__Bacilli	o__Bacillales	f__Bacillaceae	g__Bacillus	s__	0.54	0	0	0	0	0
111	k__Bacteria	p__Firmicutes	c__Bacilli	o__Bacillales	f__Bacillaceae	g__Geobacillus	__	0	0	0	0.02	0	0
112	k__Bacteria	p__Firmicutes	c__Bacilli	o__Bacillales	f__Bacillaceae	g__Geobacillus	s__thermodenitrificans	0	0	0	0.14	0	0
113	k__Bacteria	p__Firmicutes	c__Bacilli	o__Bacillales	f__Bacillaceae	g__Sinobaca	s__beijingensis	0	0.01	0	0	0	0
114	k__Bacteria	p__Firmicutes	c__Bacilli	o__Bacillales	f__Listeriaceae	g__Brochothrix	s__	0	0	0	0	1.36	0.01
115	k__Bacteria	p__Firmicutes	c__Bacilli	o__Bacillales	f__Paenibacillaceae	__	__	0	0.05	0	0.02	0	0
116	k__Bacteria	p__Firmicutes	c__Bacilli	o__Bacillales	f__Paenibacillaceae	g__	s__	0	0	0	0.04	0	0
117	k__Bacteria	p__Firmicutes	c__Bacilli	o__Bacillales	f__Paenibacillaceae	g__Ammoniphilus	s__	0	0.05	0	0.06	0.01	0
118	k__Bacteria	p__Firmicutes	c__Bacilli	o__Bacillales	f__Paenibacillaceae	g__Brevibacillus	__	0	0.03	0	1.45	0	0
119	k__Bacteria	p__Firmicutes	c__Bacilli	o__Bacillales	f__Paenibacillaceae	g__Brevibacillus	s__	0	0.67	0	0.15	0	0
120	k__Bacteria	p__Firmicutes	c__Bacilli	o__Bacillales	f__Paenibacillaceae	g__Paenibacillus	__	0	0.03	0	0.05	0	0
121	k__Bacteria	p__Firmicutes	c__Bacilli	o__Bacillales	f__Paenibacillaceae	g__Paenibacillus	s__	0	0	0	0.34	0	0
122	k__Bacteria	p__Firmicutes	c__Bacilli	o__Bacillales	f__Planococcaceae	__	__	0	0	0	0	1.27	0.4
123	k__Bacteria	p__Firmicutes	c__Bacilli	o__Bacillales	f__Planococcaceae	g__Lysinibacillus	s__boronitolerans	0	0	0	0	0.03	0
124	k__Bacteria	p__Firmicutes	c__Bacilli	o__Bacillales	f__Planococcaceae	g__Solibacillus	s__	0	0.06	0	0	0	0
125	k__Bacteria	p__Firmicutes	c__Bacilli	o__Bacillales	f__Staphylococcaceae	g__Jeotgalicoccus	s__psychrophilus	0.01	0.01	0	0	0	0
126	k__Bacteria	p__Firmicutes	c__Bacilli	o__Bacillales	f__Staphylococcaceae	g__Macrococcus	__	0	0	0	0	0.05	0.2
127	k__Bacteria	p__Firmicutes	c__Bacilli	o__Bacillales	f__Staphylococcaceae	g__Staphylococcus	__	0	0.06	0.01	0	1.59	1.32
128	k__Bacteria	p__Firmicutes	c__Bacilli	o__Bacillales	f__Staphylococcaceae	g__Staphylococcus	s__	0	0	0	0.04	0.02	0
129	k__Bacteria	p__Firmicutes	c__Bacilli	o__Bacillales	f__Staphylococcaceae	g__Staphylococcus	s__equorum	0	0	0	0.5	0.08	0.12
130	k__Bacteria	p__Firmicutes	c__Bacilli	o__Bacillales	f__Staphylococcaceae	g__Staphylococcus	s__sciuri	0	0	0	0.01	0	0
131	k__Bacteria	p__Firmicutes	c__Bacilli	o__Bacillales	f__Staphylococcaceae	g__Staphylococcus	s__succinus	0	0	0	0.09	0	0
132	k__Bacteria	p__Firmicutes	c__Bacilli	o__Bacillales	f__[Exiguobacteraceae]	g__Exiguobacterium	s__	0	0.03	0	0	0.18	0
133	k__Bacteria	p__Firmicutes	c__Bacilli	o__Lactobacillales	__	__	__	0	0	1.4	0	0	0.24
134	k__Bacteria	p__Firmicutes	c__Bacilli	o__Lactobacillales	f__Aerococcaceae	__	__	0	0.02	0	0	0	0
135	k__Bacteria	p__Firmicutes	c__Bacilli	o__Lactobacillales	f__Aerococcaceae	g__	s__	0	0.09	0	0	0	0
136	k__Bacteria	p__Firmicutes	c__Bacilli	o__Lactobacillales	f__Aerococcaceae	g__Alloiococcus	s__otitis	0	0.03	0	0	0.87	0
137	k__Bacteria	p__Firmicutes	c__Bacilli	o__Lactobacillales	f__Aerococcaceae	g__Facklamia	s__	0.01	0.11	0	0	0	0
138	k__Bacteria	p__Firmicutes	c__Bacilli	o__Lactobacillales	f__Carnobacteriaceae	g__	s__	0	0	0	0	0	0.02
139	k__Bacteria	p__Firmicutes	c__Bacilli	o__Lactobacillales	f__Carnobacteriaceae	g__Carnobacterium	s__	0	0	0	0	0.16	0.41
140	k__Bacteria	p__Firmicutes	c__Bacilli	o__Lactobacillales	f__Carnobacteriaceae	g__Trichococcus	s__	0	0.01	0	0	0	0
141	k__Bacteria	p__Firmicutes	c__Bacilli	o__Lactobacillales	f__Enterococcaceae	g__Enterococcus	__	0	0	0	0	0.16	0.11
142	k__Bacteria	p__Firmicutes	c__Bacilli	o__Lactobacillales	f__Enterococcaceae	g__Enterococcus	s__	0	0.02	0	0.04	0.53	0.7
143	k__Bacteria	p__Firmicutes	c__Bacilli	o__Lactobacillales	f__Enterococcaceae	g__Vagococcus	s__	0	0	0	0	0.07	0
144	k__Bacteria	p__Firmicutes	c__Bacilli	o__Lactobacillales	f__Lactobacillaceae	__	__	0	0	0.15	0	0.12	0.45
145	k__Bacteria	p__Firmicutes	c__Bacilli	o__Lactobacillales	f__Lactobacillaceae	g__Lactobacillus	__	0	0	0	0	0.62	7.36
146	k__Bacteria	p__Firmicutes	c__Bacilli	o__Lactobacillales	f__Lactobacillaceae	g__Lactobacillus	s__	0	0.02	0	0	0.38	0
147	k__Bacteria	p__Firmicutes	c__Bacilli	o__Lactobacillales	f__Lactobacillaceae	g__Lactobacillus	s__brevis	0	0	0.04	0	0.16	0.54
148	k__Bacteria	p__Firmicutes	c__Bacilli	o__Lactobacillales	f__Lactobacillaceae	g__Lactobacillus	s__delbrueckii	0	0.05	0	0	0	0
149	k__Bacteria	p__Firmicutes	c__Bacilli	o__Lactobacillales	f__Lactobacillaceae	g__Lactobacillus	s__helveticus	0	0.16	0	0	0.97	0
150	k__Bacteria	p__Firmicutes	c__Bacilli	o__Lactobacillales	f__Lactobacillaceae	g__Lactobacillus	s__mucosae	0	0	0	0	0.01	0
151	k__Bacteria	p__Firmicutes	c__Bacilli	o__Lactobacillales	f__Lactobacillaceae	g__Lactobacillus	s__paralimentarius	0	0	0	0	0	0.12
152	k__Bacteria	p__Firmicutes	c__Bacilli	o__Lactobacillales	f__Lactobacillaceae	g__Lactobacillus	s__reuteri	0	0	0	0	0.84	0
153	k__Bacteria	p__Firmicutes	c__Bacilli	o__Lactobacillales	f__Lactobacillaceae	g__Lactobacillus	s__zeae	0.15	0	0.3	0.09	0.11	0.61
154	k__Bacteria	p__Firmicutes	c__Bacilli	o__Lactobacillales	f__Leuconostocaceae	g__Leuconostoc	s__	0	0	0	0.01	0.41	0.27
155	k__Bacteria	p__Firmicutes	c__Bacilli	o__Lactobacillales	f__Leuconostocaceae	g__Leuconostoc	s__mesenteroides	0.01	0.03	2.38	0	0.46	10.51
156	k__Bacteria	p__Firmicutes	c__Bacilli	o__Lactobacillales	f__Streptococcaceae	g__Lactococcus	s__	0.1	0.75	54.22	1.02	6.35	67.16
157	k__Bacteria	p__Firmicutes	c__Bacilli	o__Lactobacillales	f__Streptococcaceae	g__Lactococcus	s__garvieae	0	0	0	0	0	0.11
158	k__Bacteria	p__Firmicutes	c__Bacilli	o__Lactobacillales	f__Streptococcaceae	g__Streptococcus	__	0	0	0.01	0	0.06	1.74
159	k__Bacteria	p__Firmicutes	c__Bacilli	o__Lactobacillales	f__Streptococcaceae	g__Streptococcus	s__	3.78	0.15	0.01	0.04	0.33	1.94
160	k__Bacteria	p__Firmicutes	c__Bacilli	o__Lactobacillales	f__Streptococcaceae	g__Streptococcus	s__agalactiae	0	0.03	0	0	0.07	0.04
161	k__Bacteria	p__Firmicutes	c__Bacilli	o__Lactobacillales	f__Streptococcaceae	g__Streptococcus	s__minor	0	0	0	0	0.06	0.04
162	k__Bacteria	p__Firmicutes	c__Bacilli	o__Turicibacterales	f__Turicibacteraceae	g__Turicibacter	s__	0	0.01	0	0	0.01	0
163	k__Bacteria	p__Firmicutes	c__Clostridia	o__Clostridiales	__	__	__	0.02	0.27	0	0	0.17	0
164	k__Bacteria	p__Firmicutes	c__Clostridia	o__Clostridiales	f__	g__	s__	0	0.09	0	0	0.02	0
165	k__Bacteria	p__Firmicutes	c__Clostridia	o__Clostridiales	f__Caldicoprobacteraceae	g__Caldicoprobacter	s__	0	0.01	0	0	0	0
166	k__Bacteria	p__Firmicutes	c__Clostridia	o__Clostridiales	f__Christensenellaceae	g__	s__	0	0.01	0	0	0.06	0
167	k__Bacteria	p__Firmicutes	c__Clostridia	o__Clostridiales	f__Clostridiaceae	__	__	0	0.02	0	0	0	0
168	k__Bacteria	p__Firmicutes	c__Clostridia	o__Clostridiales	f__Clostridiaceae	g__Clostridium	__	0	0.02	0	0	0	0
169	k__Bacteria	p__Firmicutes	c__Clostridia	o__Clostridiales	f__Clostridiaceae	g__Clostridium	s__	0.01	0.11	0	0	0	0
170	k__Bacteria	p__Firmicutes	c__Clostridia	o__Clostridiales	f__Clostridiaceae	g__Clostridium	s__celatum	0	0.06	0	0	0	0
171	k__Bacteria	p__Firmicutes	c__Clostridia	o__Clostridiales	f__Clostridiaceae	g__Clostridium	s__perfringens	0	0	0.02	0	0	0
172	k__Bacteria	p__Firmicutes	c__Clostridia	o__Clostridiales	f__Clostridiaceae	g__Proteiniclasticum	s__	0	0.02	0	0	0	0
173	k__Bacteria	p__Firmicutes	c__Clostridia	o__Clostridiales	f__Dehalobacteriaceae	g__Dehalobacterium	s__	0	0	0	0	0.01	0
174	k__Bacteria	p__Firmicutes	c__Clostridia	o__Clostridiales	f__Lachnospiraceae	__	__	0.03	0.09	0	0	0.03	0
175	k__Bacteria	p__Firmicutes	c__Clostridia	o__Clostridiales	f__Lachnospiraceae	g__	s__	0	0.01	0	0	0	0
176	k__Bacteria	p__Firmicutes	c__Clostridia	o__Clostridiales	f__Lachnospiraceae	g__Butyrivibrio	s__	0	0.01	0	0	0.03	0
177	k__Bacteria	p__Firmicutes	c__Clostridia	o__Clostridiales	f__Lachnospiraceae	g__Dorea	s__	0	0.03	0	0	0	0
178	k__Bacteria	p__Firmicutes	c__Clostridia	o__Clostridiales	f__Lachnospiraceae	g__Epulopiscium	s__	0	0.02	0	0	0	0
179	k__Bacteria	p__Firmicutes	c__Clostridia	o__Clostridiales	f__Lachnospiraceae	g__Moryella	s__	0	0.01	0	0	0	0
180	k__Bacteria	p__Firmicutes	c__Clostridia	o__Clostridiales	f__Lachnospiraceae	g__Roseburia	s__	0	0.02	0	0	0	0
181	k__Bacteria	p__Firmicutes	c__Clostridia	o__Clostridiales	f__Peptococcaceae	g__Niigata-25	s__	0	0.01	0	0	0	0
182	k__Bacteria	p__Firmicutes	c__Clostridia	o__Clostridiales	f__Peptococcaceae	g__Peptococcus	s__	0	0.01	0	0	0	0
183	k__Bacteria	p__Firmicutes	c__Clostridia	o__Clostridiales	f__Peptostreptococcaceae	g__[Clostridium]	__	0	0.02	0	0	0	0
184	k__Bacteria	p__Firmicutes	c__Clostridia	o__Clostridiales	f__Ruminococcaceae	__	__	0.03	0.07	0	0	0.19	0
185	k__Bacteria	p__Firmicutes	c__Clostridia	o__Clostridiales	f__Ruminococcaceae	g__	s__	0.1	0.59	0	0	0.06	0
186	k__Bacteria	p__Firmicutes	c__Clostridia	o__Clostridiales	f__Ruminococcaceae	g__Faecalibacterium	s__prausnitzii	0	0	0	0	0.02	0
187	k__Bacteria	p__Firmicutes	c__Clostridia	o__Clostridiales	f__Ruminococcaceae	g__Oscillospira	__	0	0.01	0	0	0	0
188	k__Bacteria	p__Firmicutes	c__Clostridia	o__Clostridiales	f__Ruminococcaceae	g__Oscillospira	s__	0	0.04	0	0	0.02	0
189	k__Bacteria	p__Firmicutes	c__Clostridia	o__Clostridiales	f__Ruminococcaceae	g__Ruminococcus	__	0	0.02	0	0	0	0
190	k__Bacteria	p__Firmicutes	c__Clostridia	o__Clostridiales	f__Ruminococcaceae	g__Ruminococcus	s__	0	0.02	0	0	0.03	0
191	k__Bacteria	p__Firmicutes	c__Clostridia	o__Clostridiales	f__Ruminococcaceae	g__Ruminococcus	s__albus	0	0	0	0	0.02	0
192	k__Bacteria	p__Firmicutes	c__Clostridia	o__Clostridiales	f__Ruminococcaceae	g__Ruminococcus	s__flavefaciens	0	0.0240153698366955	0	0	0	0
193	k__Bacteria	p__Firmicutes	c__Clostridia	o__Clostridiales	f__Veillonellaceae	g__	s__	0	0	0	0	0.02	0
194	k__Bacteria	p__Firmicutes	c__Clostridia	o__Clostridiales	f__Veillonellaceae	g__Anaerovibrio	s__	0	0.01	0	0	0	0
195	k__Bacteria	p__Firmicutes	c__Clostridia	o__Clostridiales	f__Veillonellaceae	g__Phascolarctobacterium	s__	0	0.04	0	0	0	0
196	k__Bacteria	p__Firmicutes	c__Clostridia	o__Clostridiales	f__Veillonellaceae	g__Selenomonas	s__ruminantium	0	0.01	0	0	0	0
197	k__Bacteria	p__Firmicutes	c__Clostridia	o__Clostridiales	f__Veillonellaceae	g__Succiniclasticum	s__	0	0	0	0	0.11	0
198	k__Bacteria	p__Firmicutes	c__Clostridia	o__Clostridiales	f__[Acidaminobacteraceae]	g__	s__	0	0.01	0	0	0	0
199	k__Bacteria	p__Firmicutes	c__Clostridia	o__Clostridiales	f__[Acidaminobacteraceae]	g__Acidaminobacter	s__	0	0	0	0	0.01	0
200	k__Bacteria	p__Firmicutes	c__Clostridia	o__Clostridiales	f__[Acidaminobacteraceae]	g__Guggenheimella	s__	0	0.1	0	0	0	0
201	k__Bacteria	p__Firmicutes	c__Clostridia	o__Clostridiales	f__[Mogibacteriaceae]	g__	s__	0	0.03	0	0	0.07	0
202	k__Bacteria	p__Firmicutes	c__Clostridia	o__Clostridiales	f__[Mogibacteriaceae]	g__Mogibacterium	s__	0	0.01	0	0	0.03	0
203	k__Bacteria	p__Firmicutes	c__Clostridia	o__Clostridiales	f__[Tissierellaceae]	g__	s__	0	0.1	0	0	0	0
204	k__Bacteria	p__Firmicutes	c__Clostridia	o__Clostridiales	f__[Tissierellaceae]	g__GW-34	s__	0	0.02	0	0	0.01	0
205	k__Bacteria	p__Firmicutes	c__Clostridia	o__Clostridiales	f__[Tissierellaceae]	g__Helcococcus	s__	0	0.02	0	0	0.02	0
206	k__Bacteria	p__Firmicutes	c__Clostridia	o__Clostridiales	f__[Tissierellaceae]	g__Parvimonas	s__	0	0	0	0	0.02	0
207	k__Bacteria	p__Firmicutes	c__Clostridia	o__Clostridiales	f__[Tissierellaceae]	g__Peptoniphilus	s__	0	0	0	0	0.01	0
208	k__Bacteria	p__Firmicutes	c__Clostridia	o__Clostridiales	f__[Tissierellaceae]	g__Sedimentibacter	s__	0	0.01	0	0	0	0
209	k__Bacteria	p__Firmicutes	c__Clostridia	o__Clostridiales	f__[Tissierellaceae]	g__Tissierella_Soehngenia	s__	0	0.07	0	0	0	0
210	k__Bacteria	p__Firmicutes	c__Erysipelotrichi	o__Erysipelotrichales	f__Erysipelotrichaceae	__	__	0	0.01	0	0	0.01	0
211	k__Bacteria	p__Firmicutes	c__Erysipelotrichi	o__Erysipelotrichales	f__Erysipelotrichaceae	g__	s__	0	0.12	0	0	0.01	0
212	k__Bacteria	p__Firmicutes	c__Erysipelotrichi	o__Erysipelotrichales	f__Erysipelotrichaceae	g__Bulleidia	s__	0.01	0.01	0	0	0.01	0
213	k__Bacteria	p__Firmicutes	c__Erysipelotrichi	o__Erysipelotrichales	f__Erysipelotrichaceae	g__Coprobacillus	s__	0	0.01	0	0	0	0
214	k__Bacteria	p__Firmicutes	c__Erysipelotrichi	o__Erysipelotrichales	f__Erysipelotrichaceae	g__Erysipelothrix	s__	0	0.06	0	0	0	0
215	k__Bacteria	p__Firmicutes	c__Erysipelotrichi	o__Erysipelotrichales	f__Erysipelotrichaceae	g__RFN20	s__	0	0.02	0	0	0	0
216	k__Bacteria	p__Firmicutes	c__Erysipelotrichi	o__Erysipelotrichales	f__Erysipelotrichaceae	g__Sharpea	s__	0.03	0.01	0	0	0.01	0
217	k__Bacteria	p__Firmicutes	c__Erysipelotrichi	o__Erysipelotrichales	f__Erysipelotrichaceae	g__[Eubacterium]	s__	0	0	0	0	0.01	0
218	k__Bacteria	p__Firmicutes	c__Erysipelotrichi	o__Erysipelotrichales	f__Erysipelotrichaceae	g__p-75-a5	s__	0	0	0	0	0	0
219	k__Bacteria	p__Fusobacteria	c__Fusobacteriia	o__Fusobacteriales	f__	g__	s__	0	0.01	0	0	0	0
220	k__Bacteria	p__Fusobacteria	c__Fusobacteriia	o__Fusobacteriales	f__Fusobacteriaceae	g__Fusobacterium	s__	0	0.01	0	0	0.05	0
221	k__Bacteria	p__Fusobacteria	c__Fusobacteriia	o__Fusobacteriales	f__Leptotrichiaceae	g__	s__	0	0	0	0	0.01	0
222	k__Bacteria	p__GN02	c__BD1-5	o__	f__	g__	s__	0	0	0	0	0.03	0
223	k__Bacteria	p__Gemmatimonadetes	c__Gemm-1	o__	f__	g__	s__	0	0	0	0	0.01	0
224	k__Bacteria	p__Lentisphaerae	c__[Lentisphaeria]	o__Victivallales	f__Victivallaceae	g__	s__	0	0.01	0	0	0	0
225	k__Bacteria	p__OD1	__	__	__	__	__	0	0	0	0	0	0
226	k__Bacteria	p__OD1	c__	o__	f__	g__	s__	0	0.05	0	0	0.05	0
227	k__Bacteria	p__OD1	c__SM2F11	o__	f__	g__	s__	0	0	0	0	0	0
228	k__Bacteria	p__Planctomycetes	c__Planctomycetia	o__Pirellulales	f__Pirellulaceae	g__	s__	0	0.01	0	0	0	0
229	k__Bacteria	p__Proteobacteria	c__Alphaproteobacteria	o__Caulobacterales	f__Caulobacteraceae	g__Brevundimonas	__	0	0	0	0	0.01	0
230	k__Bacteria	p__Proteobacteria	c__Alphaproteobacteria	o__Caulobacterales	f__Caulobacteraceae	g__Brevundimonas	s__vesicularis	0	0	0	0	0.04	0
231	k__Bacteria	p__Proteobacteria	c__Alphaproteobacteria	o__Caulobacterales	f__Caulobacteraceae	g__Caulobacter	s__	0.02	0	0	0.1	0	0
232	k__Bacteria	p__Proteobacteria	c__Alphaproteobacteria	o__Caulobacterales	f__Caulobacteraceae	g__Phenylobacterium	s__	0	0.02	0	0	0	0
233	k__Bacteria	p__Proteobacteria	c__Alphaproteobacteria	o__RF32	f__	g__	s__	0	0.02	0	0	0	0
234	k__Bacteria	p__Proteobacteria	c__Alphaproteobacteria	o__Rhizobiales	f__Beijerinckiaceae	g__	s__	0	0.01	0	0	0	0
235	k__Bacteria	p__Proteobacteria	c__Alphaproteobacteria	o__Rhizobiales	f__Bradyrhizobiaceae	__	__	0	0	0	0.01	0	0
236	k__Bacteria	p__Proteobacteria	c__Alphaproteobacteria	o__Rhizobiales	f__Bradyrhizobiaceae	g__	s__	0.04	0	0	0.06	0	0
237	k__Bacteria	p__Proteobacteria	c__Alphaproteobacteria	o__Rhizobiales	f__Hyphomicrobiaceae	g__Devosia	s__	0	0.01	0	0	0	0
238	k__Bacteria	p__Proteobacteria	c__Alphaproteobacteria	o__Rhizobiales	f__Methylobacteriaceae	g__	s__	0.03	0.65	0	0.07	0.02	0
239	k__Bacteria	p__Proteobacteria	c__Alphaproteobacteria	o__Rhizobiales	f__Phyllobacteriaceae	g__Mesorhizobium	s__	0	0	0	0.05	0	0
240	k__Bacteria	p__Proteobacteria	c__Alphaproteobacteria	o__Rhizobiales	f__Rhizobiaceae	__	__	0	0	0	0	0.03	0
241	k__Bacteria	p__Proteobacteria	c__Alphaproteobacteria	o__Rhizobiales	f__Rhizobiaceae	g__Agrobacterium	s__	1.43	0	0	1.7	0	0
242	k__Bacteria	p__Proteobacteria	c__Alphaproteobacteria	o__Rhizobiales	f__Rhizobiaceae	g__Rhizobium	__	0	0.02	0	0.02	0	0
243	k__Bacteria	p__Proteobacteria	c__Alphaproteobacteria	o__Rhodobacterales	f__Rhodobacteraceae	g__Paracoccus	s__	0	0	0	0	0.04	0
244	k__Bacteria	p__Proteobacteria	c__Alphaproteobacteria	o__Rhodobacterales	f__Rhodobacteraceae	g__Rhodobacter	__	0	0.01	0	0	0	0
245	k__Bacteria	p__Proteobacteria	c__Alphaproteobacteria	o__Rhodospirillales	f__Acetobacteraceae	g__	s__	0	0.02	0	0	0	0
246	k__Bacteria	p__Proteobacteria	c__Alphaproteobacteria	o__Rhodospirillales	f__Acetobacteraceae	g__Acetobacter	s__	0	0	0	0	0.01	0
247	k__Bacteria	p__Proteobacteria	c__Alphaproteobacteria	o__Rhodospirillales	f__Rhodospirillaceae	g__Novispirillum	s__	0	0	0	0	0.09	0
248	k__Bacteria	p__Proteobacteria	c__Alphaproteobacteria	o__Rhodospirillales	f__Rhodospirillaceae	g__Phaeospirillum	s__	0.01	0	0	0.02	0	0
249	k__Bacteria	p__Proteobacteria	c__Alphaproteobacteria	o__Rhodospirillales	f__Rhodospirillaceae	g__Reyranella	s__massiliensis	0	0	0	0.04	0	0.02
250	k__Bacteria	p__Proteobacteria	c__Alphaproteobacteria	o__Rickettsiales	__	__	__	0	0	0	0	0	0
251	k__Bacteria	p__Proteobacteria	c__Alphaproteobacteria	o__Rickettsiales	f__	g__	s__	0	0	0	0.01	0.01	0
252	k__Bacteria	p__Proteobacteria	c__Alphaproteobacteria	o__Rickettsiales	f__Rickettsiaceae	g__	s__	0.01	0	0	0.02	0	0
253	k__Bacteria	p__Proteobacteria	c__Alphaproteobacteria	o__Rickettsiales	f__mitochondria	g__	s__	0	0.04	0	0	0	0
254	k__Bacteria	p__Proteobacteria	c__Alphaproteobacteria	o__Sphingomonadales	__	__	__	0	0.01	0	0	0	0
255	k__Bacteria	p__Proteobacteria	c__Alphaproteobacteria	o__Sphingomonadales	f__	g__	s__	0	0	0	0	0	0
256	k__Bacteria	p__Proteobacteria	c__Alphaproteobacteria	o__Sphingomonadales	f__Sphingomonadaceae	g__Novosphingobium	s__capsulatum	0	0.01	0	0.03	0	0
257	k__Bacteria	p__Proteobacteria	c__Alphaproteobacteria	o__Sphingomonadales	f__Sphingomonadaceae	g__Sphingobium	s__yanoikuyae	0	0	0	0	0.02	0
258	k__Bacteria	p__Proteobacteria	c__Alphaproteobacteria	o__Sphingomonadales	f__Sphingomonadaceae	g__Sphingomonas	__	0	0	0	0.02	0	0
259	k__Bacteria	p__Proteobacteria	c__Alphaproteobacteria	o__Sphingomonadales	f__Sphingomonadaceae	g__Sphingomonas	s__	0.09	0	0	0	0	0
260	k__Bacteria	p__Proteobacteria	c__Alphaproteobacteria	o__Sphingomonadales	f__Sphingomonadaceae	g__Sphingomonas	s__wittichii	0	0	0	0	0.01	0
261	k__Bacteria	p__Proteobacteria	c__Alphaproteobacteria	o__Sphingomonadales	f__Sphingomonadaceae	g__Sphingomonas	s__yabuuchiae	0	0	0	0.01	0	0
262	k__Bacteria	p__Proteobacteria	c__Alphaproteobacteria	o__Sphingomonadales	f__Sphingomonadaceae	g__Sphingopyxis	s__alaskensis	0	0	0	0	0.01	0
263	k__Bacteria	p__Proteobacteria	c__Betaproteobacteria	__	__	__	__	0	0	0	0	0.01	0
264	k__Bacteria	p__Proteobacteria	c__Betaproteobacteria	o__Burkholderiales	f__Alcaligenaceae	__	__	0	0.02	0	0	0	0
265	k__Bacteria	p__Proteobacteria	c__Betaproteobacteria	o__Burkholderiales	f__Alcaligenaceae	g__Achromobacter	s__	0.08	0	0	0.13	0	0
266	k__Bacteria	p__Proteobacteria	c__Betaproteobacteria	o__Burkholderiales	f__Alcaligenaceae	g__Advenella	s__faeciporci	0	0.01	0	0	0	0
267	k__Bacteria	p__Proteobacteria	c__Betaproteobacteria	o__Burkholderiales	f__Alcaligenaceae	g__Oligella	s__	0	0.08	0	0	0	0
268	k__Bacteria	p__Proteobacteria	c__Betaproteobacteria	o__Burkholderiales	f__Comamonadaceae	__	__	0	0	0	0.01	0.01	0
269	k__Bacteria	p__Proteobacteria	c__Betaproteobacteria	o__Burkholderiales	f__Comamonadaceae	g__Acidovorax	__	0	0	0	0	0.5	0
270	k__Bacteria	p__Proteobacteria	c__Betaproteobacteria	o__Burkholderiales	f__Comamonadaceae	g__Aquabacterium	s__	0	0	0	0	0.03	0
271	k__Bacteria	p__Proteobacteria	c__Betaproteobacteria	o__Burkholderiales	f__Comamonadaceae	g__Comamonas	s__	0	0	0	0	5.47	0.02
272	k__Bacteria	p__Proteobacteria	c__Betaproteobacteria	o__Burkholderiales	f__Comamonadaceae	g__Comamonas	s__terrigena	0	0	0	0	0.23	0
273	k__Bacteria	p__Proteobacteria	c__Betaproteobacteria	o__Burkholderiales	f__Comamonadaceae	g__Delftia	s__	0	0	0	0	0.07	0
274	k__Bacteria	p__Proteobacteria	c__Betaproteobacteria	o__Burkholderiales	f__Comamonadaceae	g__Hylemonella	s__	0	0	0	0	0	0
275	k__Bacteria	p__Proteobacteria	c__Betaproteobacteria	o__Burkholderiales	f__Comamonadaceae	g__Limnohabitans	s__	0	0	0	0	0.04	0
276	k__Bacteria	p__Proteobacteria	c__Betaproteobacteria	o__Burkholderiales	f__Comamonadaceae	g__Pelomonas	__	0.01	0	0	0	0	0
277	k__Bacteria	p__Proteobacteria	c__Betaproteobacteria	o__Burkholderiales	f__Comamonadaceae	g__Pelomonas	s__puraquae	0	0	0	0.01	0	0
278	k__Bacteria	p__Proteobacteria	c__Betaproteobacteria	o__Burkholderiales	f__Oxalobacteraceae	__	__	0	0	0	0	0.02	0
279	k__Bacteria	p__Proteobacteria	c__Betaproteobacteria	o__Burkholderiales	f__Oxalobacteraceae	g__Cupriavidus	__	0	0	0	0.1	0	0
280	k__Bacteria	p__Proteobacteria	c__Betaproteobacteria	o__Methylophilales	f__Methylophilaceae	__	__	0	0	0	0	0.03	0
281	k__Bacteria	p__Proteobacteria	c__Betaproteobacteria	o__Methylophilales	f__Methylophilaceae	g__Methylotenera	s__mobilis	0	0	0	0	0.05	0
282	k__Bacteria	p__Proteobacteria	c__Betaproteobacteria	o__Neisseriales	f__Neisseriaceae	g__	s__	0	0	0	0	0.04	0
283	k__Bacteria	p__Proteobacteria	c__Betaproteobacteria	o__Neisseriales	f__Neisseriaceae	g__Aquaspirillum	s__putridiconchylium	0	0	0	0	0.16	0
284	k__Bacteria	p__Proteobacteria	c__Betaproteobacteria	o__Neisseriales	f__Neisseriaceae	g__Aquaspirillum	s__serpens	0	0	0	0	0.05	0
285	k__Bacteria	p__Proteobacteria	c__Betaproteobacteria	o__Neisseriales	f__Neisseriaceae	g__Microvirgula	s__aerodenitrificans	0	0	0	0	0.12	0.01
286	k__Bacteria	p__Proteobacteria	c__Betaproteobacteria	o__Neisseriales	f__Neisseriaceae	g__Vogesella	s__	0	0	0	0	0.21	0
287	k__Bacteria	p__Proteobacteria	c__Betaproteobacteria	o__Rhodocyclales	f__Rhodocyclaceae	g__	s__	0	0	0	0	0.01	0
288	k__Bacteria	p__Proteobacteria	c__Betaproteobacteria	o__Rhodocyclales	f__Rhodocyclaceae	g__Thauera	s__	0	0.08	0	0	0	0
289	k__Bacteria	p__Proteobacteria	c__Deltaproteobacteria	o__Bdellovibrionales	f__Bacteriovoracaceae	__	__	0	0	0	0	0.01	0
290	k__Bacteria	p__Proteobacteria	c__Deltaproteobacteria	o__Bdellovibrionales	f__Bacteriovoracaceae	g__Peredibacter	s__starrii	0	0.05	0	0	0	0
291	k__Bacteria	p__Proteobacteria	c__Deltaproteobacteria	o__Desulfobacterales	f__Desulfobulbaceae	g__Desulfobulbus	s__	0	0.02	0	0	0	0
292	k__Bacteria	p__Proteobacteria	c__Deltaproteobacteria	o__Desulfovibrionales	f__Desulfovibrionaceae	g__	s__	0	0.01	0	0	0	0
293	k__Bacteria	p__Proteobacteria	c__Deltaproteobacteria	o__GMD14H09	f__	g__	s__	0	0.01	0	0	0	0
294	k__Bacteria	p__Proteobacteria	c__Deltaproteobacteria	o__Myxococcales	f__0319-6G20	g__	s__	0	0.01	0	0.01	0	0
295	k__Bacteria	p__Proteobacteria	c__Epsilonproteobacteria	o__Campylobacterales	f__Campylobacteraceae	g__Arcobacter	s__	0	0	0	0	0.24	0.01
296	k__Bacteria	p__Proteobacteria	c__Epsilonproteobacteria	o__Campylobacterales	f__Campylobacteraceae	g__Arcobacter	s__cryaerophilus	0	0.07	0	0	0.6	0
297	k__Bacteria	p__Proteobacteria	c__Gammaproteobacteria	__	__	__	__	0	0.05	0	0	0	0
298	k__Bacteria	p__Proteobacteria	c__Gammaproteobacteria	o__Aeromonadales	f__Aeromonadaceae	__	__	0	0	0	0	1.11	0
299	k__Bacteria	p__Proteobacteria	c__Gammaproteobacteria	o__Aeromonadales	f__Aeromonadaceae	g__Aeromonas	__	0	0.02	0	0	1.12	0
300	k__Bacteria	p__Proteobacteria	c__Gammaproteobacteria	o__Aeromonadales	f__Succinivibrionaceae	g__Succinivibrio	s__	0	0.01	0	0	0	0
301	k__Bacteria	p__Proteobacteria	c__Gammaproteobacteria	o__Alteromonadales	__	__	__	0	0.04	0	0	0	0
302	k__Bacteria	p__Proteobacteria	c__Gammaproteobacteria	o__Alteromonadales	f__211ds20	g__	s__	0	0.01	0	0	0	0
303	k__Bacteria	p__Proteobacteria	c__Gammaproteobacteria	o__Alteromonadales	f__Alteromonadaceae	g__BD2-13	s__	0	0.01	0	0	0	0
304	k__Bacteria	p__Proteobacteria	c__Gammaproteobacteria	o__Alteromonadales	f__Shewanellaceae	g__Shewanella	s__	0	0	0	0	0.12	0.01
305	k__Bacteria	p__Proteobacteria	c__Gammaproteobacteria	o__Alteromonadales	f__[Chromatiaceae]	g__Alishewanella	s__	0	0.01	0	0	0	0
306	k__Bacteria	p__Proteobacteria	c__Gammaproteobacteria	o__Alteromonadales	f__[Chromatiaceae]	g__Rheinheimera	s__	0	0	0	0	0.67	0
307	k__Bacteria	p__Proteobacteria	c__Gammaproteobacteria	o__Enterobacteriales	f__Enterobacteriaceae	__	__	0.97	0.37	1.79	7.85	0.74	1.54
308	k__Bacteria	p__Proteobacteria	c__Gammaproteobacteria	o__Enterobacteriales	f__Enterobacteriaceae	g__Citrobacter	__	0	0	0	0	0	0.22
309	k__Bacteria	p__Proteobacteria	c__Gammaproteobacteria	o__Enterobacteriales	f__Enterobacteriaceae	g__Citrobacter	s__	0	0.04	0	0	0	0.68
310	k__Bacteria	p__Proteobacteria	c__Gammaproteobacteria	o__Enterobacteriales	f__Enterobacteriaceae	g__Enterobacter	__	0	0	0	0	0.11	0.05
311	k__Bacteria	p__Proteobacteria	c__Gammaproteobacteria	o__Enterobacteriales	f__Enterobacteriaceae	g__Morganella	__	0	0	0	0	0.08	0
312	k__Bacteria	p__Proteobacteria	c__Gammaproteobacteria	o__Enterobacteriales	f__Enterobacteriaceae	g__Morganella	s__morganii	0	0	0	0	0.02	0
313	k__Bacteria	p__Proteobacteria	c__Gammaproteobacteria	o__Enterobacteriales	f__Enterobacteriaceae	g__Pseudomonas	s__syringae	0	0	0	0	0.01	0
314	k__Bacteria	p__Proteobacteria	c__Gammaproteobacteria	o__Enterobacteriales	f__Enterobacteriaceae	g__Rahnella	s__aquatilis	0	0	0.02	0	1.06	0.04
315	k__Bacteria	p__Proteobacteria	c__Gammaproteobacteria	o__Enterobacteriales	f__Enterobacteriaceae	g__Serratia	s__	0	4.31	36.36	0.13	0.97	0.03
316	k__Bacteria	p__Proteobacteria	c__Gammaproteobacteria	o__Legionellales	f__	g__	s__	0	0	0	0.01	0	0
317	k__Bacteria	p__Proteobacteria	c__Gammaproteobacteria	o__Legionellales	f__Legionellaceae	g__	s__	0.15	0	0	0.11	0	0
318	k__Bacteria	p__Proteobacteria	c__Gammaproteobacteria	o__Legionellales	f__Legionellaceae	g__Legionella	s__	0	0	0	0.01	0	0
319	k__Bacteria	p__Proteobacteria	c__Gammaproteobacteria	o__Methylococcales	f__Crenotrichaceae	g__Crenothrix	s__	0	0	0	0	0.01	0
320	k__Bacteria	p__Proteobacteria	c__Gammaproteobacteria	o__Oceanospirillales	f__Halomonadaceae	g__Halomonas	s__	0	0	0	0	0.01	0
321	k__Bacteria	p__Proteobacteria	c__Gammaproteobacteria	o__Pasteurellales	f__Pasteurellaceae	__	__	0	0	0	0	0	0
322	k__Bacteria	p__Proteobacteria	c__Gammaproteobacteria	o__Pasteurellales	f__Pasteurellaceae	g__Mannheimia	s__	0.13	0.22	0	0	0	0.03
323	k__Bacteria	p__Proteobacteria	c__Gammaproteobacteria	o__Pseudomonadales	f__Moraxellaceae	__	__	0	0.03	0	0	0.02	0
324	k__Bacteria	p__Proteobacteria	c__Gammaproteobacteria	o__Pseudomonadales	f__Moraxellaceae	g__Acinetobacter	s__	0	0.16	0	0	1.9	0.17
325	k__Bacteria	p__Proteobacteria	c__Gammaproteobacteria	o__Pseudomonadales	f__Moraxellaceae	g__Acinetobacter	s__guillouiae	0	0.24	0	0	1.52	0.12
326	k__Bacteria	p__Proteobacteria	c__Gammaproteobacteria	o__Pseudomonadales	f__Moraxellaceae	g__Acinetobacter	s__johnsonii	0	1.19	0	0	6.67	1.16
327	k__Bacteria	p__Proteobacteria	c__Gammaproteobacteria	o__Pseudomonadales	f__Moraxellaceae	g__Acinetobacter	s__lwoffii	0	0.08	0	0	0	0
328	k__Bacteria	p__Proteobacteria	c__Gammaproteobacteria	o__Pseudomonadales	f__Moraxellaceae	g__Enhydrobacter	__	0	0.12	0	0	3.93	0.04
329	k__Bacteria	p__Proteobacteria	c__Gammaproteobacteria	o__Pseudomonadales	f__Moraxellaceae	g__Psychrobacter	__	0	0.06	0	0	0	0
330	k__Bacteria	p__Proteobacteria	c__Gammaproteobacteria	o__Pseudomonadales	f__Moraxellaceae	g__Psychrobacter	s__	0	0.02	0	0	0	0
331	k__Bacteria	p__Proteobacteria	c__Gammaproteobacteria	o__Pseudomonadales	f__Moraxellaceae	g__Psychrobacter	s__pulmonis	0	0	0	0	0.03	0
332	k__Bacteria	p__Proteobacteria	c__Gammaproteobacteria	o__Pseudomonadales	f__Pseudomonadaceae	__	__	0.03	0.13	0	0.11	0	0
333	k__Bacteria	p__Proteobacteria	c__Gammaproteobacteria	o__Pseudomonadales	f__Pseudomonadaceae	g__Pseudomonas	__	1.3	0.27	0	0.66	2.6	0
334	k__Bacteria	p__Proteobacteria	c__Gammaproteobacteria	o__Pseudomonadales	f__Pseudomonadaceae	g__Pseudomonas	s__	0	0	0	0	0.02	0
335	k__Bacteria	p__Proteobacteria	c__Gammaproteobacteria	o__Pseudomonadales	f__Pseudomonadaceae	g__Pseudomonas	s__alcaligenes	0	0	0	0	0.04	0
336	k__Bacteria	p__Proteobacteria	c__Gammaproteobacteria	o__Pseudomonadales	f__Pseudomonadaceae	g__Pseudomonas	s__caeni	0	0.03	0	0	0	0
337	k__Bacteria	p__Proteobacteria	c__Gammaproteobacteria	o__Pseudomonadales	f__Pseudomonadaceae	g__Pseudomonas	s__fragi	0	80.5	3.18	0	2.35	0
338	k__Bacteria	p__Proteobacteria	c__Gammaproteobacteria	o__Pseudomonadales	f__Pseudomonadaceae	g__Pseudomonas	s__stutzeri	0.03	0	0	0.08	0	0
339	k__Bacteria	p__Proteobacteria	c__Gammaproteobacteria	o__Pseudomonadales	f__Pseudomonadaceae	g__Pseudomonas	s__umsongensis	0	0.02	0	0	0.03	0
340	k__Bacteria	p__Proteobacteria	c__Gammaproteobacteria	o__Pseudomonadales	f__Pseudomonadaceae	g__Pseudomonas	s__veronii	43.83	0.25	0.02	58.95	3.34	0.04
341	k__Bacteria	p__Proteobacteria	c__Gammaproteobacteria	o__Pseudomonadales	f__Pseudomonadaceae	g__Pseudomonas	s__viridiflava	0	0	0	0	0.47	0
342	k__Bacteria	p__Proteobacteria	c__Gammaproteobacteria	o__Vibrionales	f__Pseudoalteromonadaceae	g__Pseudoalteromonas	__	0	0	0	0	0	0.05
343	k__Bacteria	p__Proteobacteria	c__Gammaproteobacteria	o__Vibrionales	f__Vibrionaceae	g__Vibrio	__	0	0.01	0	0	0	0
344	k__Bacteria	p__Proteobacteria	c__Gammaproteobacteria	o__Vibrionales	f__Vibrionaceae	g__Vibrio	s__metschnikovii	0	0.03	0	0	0	0
345	k__Bacteria	p__Proteobacteria	c__Gammaproteobacteria	o__Xanthomonadales	f__Xanthomonadaceae	__	__	0	0	0	0	0.02	0
346	k__Bacteria	p__Proteobacteria	c__Gammaproteobacteria	o__Xanthomonadales	f__Xanthomonadaceae	g__	s__	0	0.15	0	0.02	0.02	0
347	k__Bacteria	p__Proteobacteria	c__Gammaproteobacteria	o__Xanthomonadales	f__Xanthomonadaceae	g__Pseudoxanthomonas	__	0.06	0	0	0.05	0	0
348	k__Bacteria	p__Proteobacteria	c__Gammaproteobacteria	o__Xanthomonadales	f__Xanthomonadaceae	g__Stenotrophomonas	__	29.42	0	0.01	15.67	0	0.06
349	k__Bacteria	p__Proteobacteria	c__Gammaproteobacteria	o__Xanthomonadales	f__Xanthomonadaceae	g__Stenotrophomonas	s__acidaminiphila	0	0	0	0	0.17	0.01
350	k__Bacteria	p__Proteobacteria	c__Gammaproteobacteria	o__Xanthomonadales	f__Xanthomonadaceae	g__Stenotrophomonas	s__geniculata	15.62	0	0	8.64	0.08	0
351	k__Bacteria	p__Spirochaetes	c__[Leptospirae]	o__[Leptospirales]	f__Leptospiraceae	g__Turneriella	s__	0	0	0	0	0	0
352	k__Bacteria	p__Synergistetes	c__Synergistia	o__Synergistales	f__Synergistaceae	g__	s__	0	0	0	0	0.01	0
353	k__Bacteria	p__Synergistetes	c__Synergistia	o__Synergistales	f__Synergistaceae	g__vadinCA02	s__	0	0.01	0	0	0	0
354	k__Bacteria	p__TM7	c__TM7-1	o__	f__	g__	s__	0	0.01	0	0	0	0
355	k__Bacteria	p__TM7	c__TM7-3	__	__	__	__	0	0	0	0	0.01	0
356	k__Bacteria	p__TM7	c__TM7-3	o__	f__	g__	s__	0	0.05	0	0	0	0
357	k__Bacteria	p__TM7	c__TM7-3	o__CW040	f__F16	g__	s__	0	0.03	0	0	0.02	0
358	k__Bacteria	p__TM7	c__TM7-3	o__EW055	f__	g__	s__	0.38	0	0	0	0	0
359	k__Bacteria	p__Tenericutes	c__Mollicutes	o__Acholeplasmatales	f__Acholeplasmataceae	g__	s__	0	0.01	0	0	0	0
360	k__Bacteria	p__Tenericutes	c__Mollicutes	o__Acholeplasmatales	f__Acholeplasmataceae	g__Acholeplasma	s__	0	0.07	0	0	0	0
361	k__Bacteria	p__Tenericutes	c__Mollicutes	o__Anaeroplasmatales	f__Anaeroplasmataceae	g__Anaeroplasma	s__	0	0	0	0	0	0
362	k__Bacteria	p__Tenericutes	c__Mollicutes	o__RF39	f__	g__	s__	0	0.04	0	0	0	0
363	k__Bacteria	p__Verrucomicrobia	c__Opitutae	o__Puniceicoccales	f__Puniceicoccaceae	g__	s__	0	0.01	0	0	0	0
364	k__Bacteria	p__Verrucomicrobia	c__Verruco-5	o__WCHB1-41	f__	g__	s__	0.01	0.01	0	0	0	0
365	k__Bacteria	p__Verrucomicrobia	c__Verruco-5	o__WCHB1-41	f__RFP12	g__	s__	0	0.01	0	0	0.04	0
366	k__Bacteria	p__Verrucomicrobia	c__Verruco-5	o__WCHB1-41	f__WCHB1-25	g__	s__	0	0.01	0	0	0	0
367	k__Bacteria	p__Verrucomicrobia	c__Verrucomicrobiae	o__Verrucomicrobiales	f__Verrucomicrobiaceae	__	__	0	0.01	0	0	0	0
368	k__Bacteria	p__Verrucomicrobia	c__Verrucomicrobiae	o__Verrucomicrobiales	f__Verrucomicrobiaceae	g__Akkermansia	s__	0	0.03	0	0	0.02	0
369	k__Bacteria	p__WWE1	c__[Cloacamonae]	o__[Cloacamonales]	f__[Cloacamonaceae]	g__W22	s__	0	0.01	0	0	0	0
370	k__Bacteria	p__[Thermi]	c__Deinococci	o__Deinococcales	f__Deinococcaceae	g__Deinococcus	s__	0	0	0	0.05	0	0
371	k__Bacteria	p__[Thermi]	c__Deinococci	o__Thermales	f__Thermaceae	g__Meiothermus	s__	0	0.02	0	0	0	0
372	k__Bacteria	p__[Thermi]	c__Deinococci	o__Thermales	f__Thermaceae	g__Thermus	s__	0.02	0.16	0	0.34	0.09	0
Total reeds abundance (%)								100	100	100	100	100	100
Mi = milk; Cu = curd; Ch = cheese
CSB = Comisana sheep breed	LSB = Lacaune sheeep breed

## Sheet: Table S3
Table S3. Core microbiome of CBS and LSB milk.
OTUs ID	Kindom	Phylum	Class	Order	Family	Genus	Species	OTUs %
								CSB_Mi	LSB_Mi
1	k__Bacteria	unknown	unknown	unknown	unknown	unknown	unknown	0.22	0.28
14	k__Bacteria	p__Actinobacteria	c__Actinobacteria	o__Actinomycetales	f__Corynebacteriaceae	g__Corynebacterium	unknown	0.12	0.02
20	k__Bacteria	p__Actinobacteria	c__Actinobacteria	o__Actinomycetales	f__Microbacteriaceae	g__Microbacterium	unknown	0.04	0.01
26	k__Bacteria	p__Actinobacteria	c__Actinobacteria	o__Actinomycetales	f__Mycobacteriaceae	g__Mycobacterium	unknown	0.04	0.01
71	k__Bacteria	p__Bacteroidetes	c__Cytophagia	o__Cytophagales	f__Cytophagaceae	g__Spirosoma	unknown	0.01	0.03
153	k__Bacteria	p__Firmicutes	c__Bacilli	o__Lactobacillales	f__Lactobacillaceae	g__Lactobacillus	s__zeae	0.15	0.09
156	k__Bacteria	p__Firmicutes	c__Bacilli	o__Lactobacillales	f__Streptococcaceae	g__Lactococcus	unknown	0.1	1.02
159	k__Bacteria	p__Firmicutes	c__Bacilli	o__Lactobacillales	f__Streptococcaceae	g__Streptococcus	unknown	3.78	0.04
231	k__Bacteria	p__Proteobacteria	c__Alphaproteobacteria	o__Caulobacterales	f__Caulobacteraceae	g__Caulobacter	unknown	0.02	0.1
236	k__Bacteria	p__Proteobacteria	c__Alphaproteobacteria	o__Rhizobiales	f__Bradyrhizobiaceae	unknown	unknown	0.04	0.06
238	k__Bacteria	p__Proteobacteria	c__Alphaproteobacteria	o__Rhizobiales	f__Methylobacteriaceae	unknown	unknown	0.03	0.07
241	k__Bacteria	p__Proteobacteria	c__Alphaproteobacteria	o__Rhizobiales	f__Rhizobiaceae	g__Agrobacterium	unknown	1.43	1.7
248	k__Bacteria	p__Proteobacteria	c__Alphaproteobacteria	o__Rhodospirillales	f__Rhodospirillaceae	g__Phaeospirillum	unknown	0.01	0.02
252	k__Bacteria	p__Proteobacteria	c__Alphaproteobacteria	o__Rickettsiales	f__Rickettsiaceae	g__	unknown	0.01	0.02
265	k__Bacteria	p__Proteobacteria	c__Betaproteobacteria	o__Burkholderiales	f__Alcaligenaceae	g__Achromobacter	unknown	0.08	0.13
307	k__Bacteria	p__Proteobacteria	c__Gammaproteobacteria	o__Enterobacteriales	f__Enterobacteriaceae	unknown	unknown	0.97	7.85
317	k__Bacteria	p__Proteobacteria	c__Gammaproteobacteria	o__Legionellales	f__Legionellaceae	unknown	unknown	0.15	0.11
332	k__Bacteria	p__Proteobacteria	c__Gammaproteobacteria	o__Pseudomonadales	f__Pseudomonadaceae	unknown	unknown	0.03	0.11
333	k__Bacteria	p__Proteobacteria	c__Gammaproteobacteria	o__Pseudomonadales	f__Pseudomonadaceae	g__Pseudomonas	unknown	1.3	0.66
338	k__Bacteria	p__Proteobacteria	c__Gammaproteobacteria	o__Pseudomonadales	f__Pseudomonadaceae	g__Pseudomonas	s__stutzeri	0.03	0.08
340	k__Bacteria	p__Proteobacteria	c__Gammaproteobacteria	o__Pseudomonadales	f__Pseudomonadaceae	g__Pseudomonas	s__veronii	43.83	58.95
347	k__Bacteria	p__Proteobacteria	c__Gammaproteobacteria	o__Xanthomonadales	f__Xanthomonadaceae	g__Pseudoxanthomonas	unknown	0.06	0.05
348	k__Bacteria	p__Proteobacteria	c__Gammaproteobacteria	o__Xanthomonadales	f__Xanthomonadaceae	g__Stenotrophomonas	unknown	29.42	15.67
350	k__Bacteria	p__Proteobacteria	c__Gammaproteobacteria	o__Xanthomonadales	f__Xanthomonadaceae	g__Stenotrophomonas	s__geniculata	15.62	8.64
372	k__Bacteria	p__[Thermi]	c__Deinococci	o__Thermales	f__Thermaceae	g__Thermus	unknown	0.02	0.34
Total reeds abundance (%)								97.5	96.1
CSB = Comisana sheep breed		LSB = Lacaune sheeep breed
Mi = milk

## Sheet: Table S4
Table S4. Core microbiome of CBS and LSB curd.
OTUs ID	Kindom	Phylum	Class	Order	Family	Genus	Species	OTUs %
								CSB_Cu	LSB_Cu
1	k__Bacteria	unknown	unknown	unknown	unknown	unknown	unknown	0.34	0.79
13	k__Bacteria	p__Actinobacteria	c__Actinobacteria	o__Actinomycetales	f__Brevibacteriaceae	g__Brevibacterium	unknown	0.02	0.02
14	k__Bacteria	p__Actinobacteria	c__Actinobacteria	o__Actinomycetales	f__Corynebacteriaceae	g__Corynebacterium	unknown	0.53	0.06
41	k__Bacteria	p__Bacteroidetes	c__Bacteroidia	o__Bacteroidales	unknown	unknown	unknown	0.22	0.1
43	k__Bacteria	p__Bacteroidetes	c__Bacteroidia	o__Bacteroidales	f__Bacteroidaceae	g__5-7N15	unknown	0.19	0.01
46	k__Bacteria	p__Bacteroidetes	c__Bacteroidia	o__Bacteroidales	f__Bacteroidaceae	g__Bacteroides	unknown	0.01	0.03
54	k__Bacteria	p__Bacteroidetes	c__Bacteroidia	o__Bacteroidales	f__Porphyromonadaceae	g__Porphyromonas	unknown	0.01	0.03
56	k__Bacteria	p__Bacteroidetes	c__Bacteroidia	o__Bacteroidales	f__Prevotellaceae	g__Prevotella	unknown	0.05	0.2
61	k__Bacteria	p__Bacteroidetes	c__Bacteroidia	o__Bacteroidales	f__S24-7	unknown	unknown	0.01	0.06
75	k__Bacteria	p__Bacteroidetes	c__Flavobacteriia	o__Flavobacteriales	f__Flavobacteriaceae	unknown	unknown	0.05	0.02
78	k__Bacteria	p__Bacteroidetes	c__Flavobacteriia	o__Flavobacteriales	f__Flavobacteriaceae	g__Flavobacterium	unknown	0.01	0.03
82	k__Bacteria	p__Bacteroidetes	c__Flavobacteriia	o__Flavobacteriales	f__[Weeksellaceae]	g__Chryseobacterium	unknown	0.23	2.37
84	k__Bacteria	p__Bacteroidetes	c__Flavobacteriia	o__Flavobacteriales	f__[Weeksellaceae]	g__Wautersiella	unknown	0.01	1.16
86	k__Bacteria	p__Bacteroidetes	c__Sphingobacteriia	o__Sphingobacteriales	f__Sphingobacteriaceae	unknown	unknown	0.06	0.01
89	k__Bacteria	p__Bacteroidetes	c__Sphingobacteriia	o__Sphingobacteriales	f__Sphingobacteriaceae	g__Sphingobacterium	s__faecium	0.6	0.05
99	k__Bacteria	p__Chloroflexi	c__Thermomicrobia	o__JG30-KF-CM45	unknown	unknown	unknown	0.01	0.01
103	k__Bacteria	p__Cyanobacteria	c__Chloroplast	o__Stramenopiles	unknown	unknown	unknown	0.05	0.01
117	k__Bacteria	p__Firmicutes	c__Bacilli	o__Bacillales	f__Paenibacillaceae	g__Ammoniphilus	unknown	0.05	0.01
127	k__Bacteria	p__Firmicutes	c__Bacilli	o__Bacillales	f__Staphylococcaceae	g__Staphylococcus	unknown	0.06	1.59
132	k__Bacteria	p__Firmicutes	c__Bacilli	o__Bacillales	f__[Exiguobacteraceae]	g__Exiguobacterium	unknown	0.03	0.18
136	k__Bacteria	p__Firmicutes	c__Bacilli	o__Lactobacillales	f__Aerococcaceae	g__Alloiococcus	s__otitis	0.03	0.87
142	k__Bacteria	p__Firmicutes	c__Bacilli	o__Lactobacillales	f__Enterococcaceae	g__Enterococcus	unknown	0.02	0.53
146	k__Bacteria	p__Firmicutes	c__Bacilli	o__Lactobacillales	f__Lactobacillaceae	g__Lactobacillus	unknown	0.02	0.38
149	k__Bacteria	p__Firmicutes	c__Bacilli	o__Lactobacillales	f__Lactobacillaceae	g__Lactobacillus	s__helveticus	0.16	0.97
155	k__Bacteria	p__Firmicutes	c__Bacilli	o__Lactobacillales	f__Leuconostocaceae	g__Leuconostoc	s__mesenteroides	0.03	0.46
156	k__Bacteria	p__Firmicutes	c__Bacilli	o__Lactobacillales	f__Streptococcaceae	g__Lactococcus	unknown	0.75	6.35
159	k__Bacteria	p__Firmicutes	c__Bacilli	o__Lactobacillales	f__Streptococcaceae	g__Streptococcus	unknown	0.15	0.33
160	k__Bacteria	p__Firmicutes	c__Bacilli	o__Lactobacillales	f__Streptococcaceae	g__Streptococcus	s__agalactiae	0.03	0.07
162	k__Bacteria	p__Firmicutes	c__Bacilli	o__Turicibacterales	f__Turicibacteraceae	g__Turicibacter	unknown	0.01	0.01
163	k__Bacteria	p__Firmicutes	c__Clostridia	o__Clostridiales	unknown	unknown	unknown	0.27	0.17
164	k__Bacteria	p__Firmicutes	c__Clostridia	o__Clostridiales	unknown	unknown	unknown	0.09	0.02
166	k__Bacteria	p__Firmicutes	c__Clostridia	o__Clostridiales	f__Christensenellaceae	unknown	unknown	0.01	0.06
174	k__Bacteria	p__Firmicutes	c__Clostridia	o__Clostridiales	f__Lachnospiraceae	unknown	unknown	0.09	0.03
176	k__Bacteria	p__Firmicutes	c__Clostridia	o__Clostridiales	f__Lachnospiraceae	g__Butyrivibrio	unknown	0.01	0.03
184	k__Bacteria	p__Firmicutes	c__Clostridia	o__Clostridiales	f__Ruminococcaceae	unknown	unknown	0.07	0.19
185	k__Bacteria	p__Firmicutes	c__Clostridia	o__Clostridiales	f__Ruminococcaceae	unknown	unknown	0.59	0.06
188	k__Bacteria	p__Firmicutes	c__Clostridia	o__Clostridiales	f__Ruminococcaceae	g__Oscillospira	unknown	0.04	0.02
190	k__Bacteria	p__Firmicutes	c__Clostridia	o__Clostridiales	f__Ruminococcaceae	g__Ruminococcus	unknown	0.02	0.03
201	k__Bacteria	p__Firmicutes	c__Clostridia	o__Clostridiales	f__[Mogibacteriaceae]	unknown	unknown	0.03	0.07
202	k__Bacteria	p__Firmicutes	c__Clostridia	o__Clostridiales	f__[Mogibacteriaceae]	g__Mogibacterium	unknown	0.01	0.03
204	k__Bacteria	p__Firmicutes	c__Clostridia	o__Clostridiales	f__[Tissierellaceae]	g__GW-34	unknown	0.02	0.01
205	k__Bacteria	p__Firmicutes	c__Clostridia	o__Clostridiales	f__[Tissierellaceae]	g__Helcococcus	unknown	0.02	0.02
210	k__Bacteria	p__Firmicutes	c__Erysipelotrichi	o__Erysipelotrichales	f__Erysipelotrichaceae	unknown	unknown	0.01	0.01
211	k__Bacteria	p__Firmicutes	c__Erysipelotrichi	o__Erysipelotrichales	f__Erysipelotrichaceae	unknown	unknown	0.12	0.01
212	k__Bacteria	p__Firmicutes	c__Erysipelotrichi	o__Erysipelotrichales	f__Erysipelotrichaceae	g__Bulleidia	unknown	0.01	0.01
216	k__Bacteria	p__Firmicutes	c__Erysipelotrichi	o__Erysipelotrichales	f__Erysipelotrichaceae	g__Sharpea	unknown	0.01	0.01
220	k__Bacteria	p__Fusobacteria	c__Fusobacteriia	o__Fusobacteriales	f__Fusobacteriaceae	g__Fusobacterium	unknown	0.01	0.05
226	k__Bacteria	p__OD1	unknown	unknown	unknown	unknown	unknown	0.05	0.05
238	k__Bacteria	p__Proteobacteria	c__Alphaproteobacteria	o__Rhizobiales	f__Methylobacteriaceae	unknown	unknown	0.65	0.02
296	k__Bacteria	p__Proteobacteria	c__Epsilonproteobacteria	o__Campylobacterales	f__Campylobacteraceae	g__Arcobacter	s__cryaerophilus	0.07	0.6
299	k__Bacteria	p__Proteobacteria	c__Gammaproteobacteria	o__Aeromonadales	f__Aeromonadaceae	g__Aeromonas	unknown	0.02	1.12
307	k__Bacteria	p__Proteobacteria	c__Gammaproteobacteria	o__Enterobacteriales	f__Enterobacteriaceae	unknown	unknown	0.37	0.74
315	k__Bacteria	p__Proteobacteria	c__Gammaproteobacteria	o__Enterobacteriales	f__Enterobacteriaceae	g__Serratia	unknown	4.31	0.97
323	k__Bacteria	p__Proteobacteria	c__Gammaproteobacteria	o__Pseudomonadales	f__Moraxellaceae	unknown	unknown	0.03	0.02
324	k__Bacteria	p__Proteobacteria	c__Gammaproteobacteria	o__Pseudomonadales	f__Moraxellaceae	g__Acinetobacter	unknown	0.16	1.9
325	k__Bacteria	p__Proteobacteria	c__Gammaproteobacteria	o__Pseudomonadales	f__Moraxellaceae	g__Acinetobacter	s__guillouiae	0.24	1.52
326	k__Bacteria	p__Proteobacteria	c__Gammaproteobacteria	o__Pseudomonadales	f__Moraxellaceae	g__Acinetobacter	s__johnsonii	1.19	6.67
328	k__Bacteria	p__Proteobacteria	c__Gammaproteobacteria	o__Pseudomonadales	f__Moraxellaceae	g__Enhydrobacter	unknown	0.12	3.93
333	k__Bacteria	p__Proteobacteria	c__Gammaproteobacteria	o__Pseudomonadales	f__Pseudomonadaceae	g__Pseudomonas	unknown	0.27	2.6
337	k__Bacteria	p__Proteobacteria	c__Gammaproteobacteria	o__Pseudomonadales	f__Pseudomonadaceae	g__Pseudomonas	s__fragi	80.5	2.35
339	k__Bacteria	p__Proteobacteria	c__Gammaproteobacteria	o__Pseudomonadales	f__Pseudomonadaceae	g__Pseudomonas	s__umsongensis	0.02	0.03
340	k__Bacteria	p__Proteobacteria	c__Gammaproteobacteria	o__Pseudomonadales	f__Pseudomonadaceae	g__Pseudomonas	s__veronii	0.25	3.34
346	k__Bacteria	p__Proteobacteria	c__Gammaproteobacteria	o__Xanthomonadales	f__Xanthomonadaceae	unknown	unknown	0.15	0.02
357	k__Bacteria	p__TM7	c__TM7-3	o__CW040	f__F16	unknown	unknown	0.03	0.02
365	k__Bacteria	p__Verrucomicrobia	c__Verruco-5	o__WCHB1-41	f__RFP12	unknown	unknown	0.01	0.04
368	k__Bacteria	p__Verrucomicrobia	c__Verrucomicrobiae	o__Verrucomicrobiales	f__Verrucomicrobiaceae	g__Akkermansia	unknown	0.03	0.02
372	k__Bacteria	p__[Thermi]	c__Deinococci	o__Thermales	f__Thermaceae	g__Thermus	unknown	0.16	0.09
CSB = Comisana sheep breed		LSB = Lacaune sheeep breed
Cu = curd

## Sheet: Table S5
Table S5. ID and taxonomic affiliation of the OTUs shared between milk and cheese samples.
Panel A: CSB datasets
OTUs ID	Kindom	Phylum	Class	Order	Family	Genus	Species	OTUs %
								CSB_Mi	CSB_Ch
1	k__Bacteria	unknown	unknown	unknown	unknown	unknown	unknown	0.22	0.03
104	k__Bacteria	p__Cyanobacteria	c__Chloroplast	o__Streptophyta	unknown	unknown	unknown	0.02	0.01
153	k__Bacteria	p__Firmicutes	c__Bacilli	o__Lactobacillales	f__Lactobacillaceae	g__Lactobacillus	s__zeae	0.15	0.3
155	k__Bacteria	p__Firmicutes	c__Bacilli	o__Lactobacillales	f__Leuconostocaceae	g__Leuconostoc	s__mesenteroides	0.01	2.38
156	k__Bacteria	p__Firmicutes	c__Bacilli	o__Lactobacillales	f__Streptococcaceae	g__Lactococcus	unknown	0.1	54.22
159	k__Bacteria	p__Firmicutes	c__Bacilli	o__Lactobacillales	f__Streptococcaceae	g__Streptococcus	unknown	3.78	0.01
307	k__Bacteria	p__Proteobacteria	c__Gammaproteobacteria	o__Enterobacteriales	f__Enterobacteriaceae	unknown	unknown	0.97	1.79
340	k__Bacteria	p__Proteobacteria	c__Gammaproteobacteria	o__Pseudomonadales	f__Pseudomonadaceae	g__Pseudomonas	s__veronii	43.83	0.02
348	k__Bacteria	p__Proteobacteria	c__Gammaproteobacteria	o__Xanthomonadales	f__Xanthomonadaceae	g__Stenotrophomonas	unknown	29.42	0.01
Panel B: LSB datasets
OTUs ID	Kindom	Phylum	Class	Order	Family	Genus	Species	OTUs %
								LSB_Mi	LSB_Ch
1	k__Bacteria	unknown	unknown	unknown	unknown	unknown	unknown	0.28	0.09
12	k__Bacteria	p__Actinobacteria	c__Actinobacteria	o__Actinomycetales	f__Brevibacteriaceae	g__Brevibacterium	unknown	0.01	0.01
25	k__Bacteria	p__Actinobacteria	c__Actinobacteria	o__Actinomycetales	f__Micrococcaceae	g__Rothia	s__nasimurium	0.01	0.03
129	k__Bacteria	p__Firmicutes	c__Bacilli	o__Bacillales	f__Staphylococcaceae	g__Staphylococcus	s__equorum	0.5	0.12
142	k__Bacteria	p__Firmicutes	c__Bacilli	o__Lactobacillales	f__Enterococcaceae	g__Enterococcus	unknown	0.04	0.7
153	k__Bacteria	p__Firmicutes	c__Bacilli	o__Lactobacillales	f__Lactobacillaceae	g__Lactobacillus	s__zeae	0.09	0.61
154	k__Bacteria	p__Firmicutes	c__Bacilli	o__Lactobacillales	f__Leuconostocaceae	g__Leuconostoc	unknown	0.01	0.27
156	k__Bacteria	p__Firmicutes	c__Bacilli	o__Lactobacillales	f__Streptococcaceae	g__Lactococcus	unknown	1.02	67.16
159	k__Bacteria	p__Firmicutes	c__Bacilli	o__Lactobacillales	f__Streptococcaceae	g__Streptococcus	unknown	0.04	1.94
249	k__Bacteria	p__Proteobacteria	c__Alphaproteobacteria	o__Rhodospirillales	f__Rhodospirillaceae	g__Reyranella	s__massiliensis	0.04	0.02
307	k__Bacteria	p__Proteobacteria	c__Gammaproteobacteria	o__Enterobacteriales	f__Enterobacteriaceae	unknown	unknown	7.85	1.54
315	k__Bacteria	p__Proteobacteria	c__Gammaproteobacteria	o__Enterobacteriales	f__Enterobacteriaceae	g__Serratia	unknown	0.13	0.03
340	k__Bacteria	p__Proteobacteria	c__Gammaproteobacteria	o__Pseudomonadales	f__Pseudomonadaceae	g__Pseudomonas	s__veronii	58.95	0.04
348	k__Bacteria	p__Proteobacteria	c__Gammaproteobacteria	o__Xanthomonadales	f__Xanthomonadaceae	g__Stenotrophomonas	unknown	15.67	0.06
CSB = Comisana sheep breed		LSB = Lacaune sheeep breed
Mi = milk; Cu = curd
line in gray indicated OTUs shared among molk, curd and cheese datasets

## Sheet: Table S6
Table S6. ID and taxonomic affiliation of the unique OTUs in cheese samples.
Panel A: CSB datasets
OTUs ID	Kindom	Phylum	Class	Order	Family	Genus	Species	OTUs %
								CSB_Ch
34	k__Bacteria	p__Actinobacteria	c__Actinobacteria	o__Bifidobacteriales	f__Bifidobacteriaceae	unknown	unknown	0.03
133	k__Bacteria	p__Firmicutes	c__Bacilli	o__Lactobacillales	unknown	unknown	unknown	1.40
144	k__Bacteria	p__Firmicutes	c__Bacilli	o__Lactobacillales	f__Lactobacillaceae	unknown	unknown	0.15
147	k__Bacteria	p__Firmicutes	c__Bacilli	o__Lactobacillales	f__Lactobacillaceae	g__Lactobacillus	s__brevis	0.04
158	k__Bacteria	p__Firmicutes	c__Bacilli	o__Lactobacillales	f__Streptococcaceae	g__Streptococcus	unknown	0.01
171	k__Bacteria	p__Firmicutes	c__Clostridia	o__Clostridiales	f__Clostridiaceae	g__Clostridium	s__perfringens	0.02
314	k__Bacteria	p__Proteobacteria	c__Gammaproteobacteria	o__Enterobacteriales	f__Enterobacteriaceae	g__Rahnella	s__aquatilis	0.02
Panel B: LSB datasets
OTUs ID	Kindom	Phylum	Class	Order	Family	Genus	Species	OTUs %
								LSB_Ch
16	k__Bacteria	p__Actinobacteria	c__Actinobacteria	o__Actinomycetales	f__Dermabacteraceae	unknown	unknown	0.01
24	k__Bacteria	p__Actinobacteria	c__Actinobacteria	o__Actinomycetales	f__Micrococcaceae	g__Rothia	unknown	0.02
72	k__Bacteria	p__Bacteroidetes	c__Flavobacteriia	o__Flavobacteriales	unknown	unknown	unknown	0.01
133	k__Bacteria	p__Firmicutes	c__Bacilli	o__Lactobacillales	unknown	unknown	unknown	0.24
138	k__Bacteria	p__Firmicutes	c__Bacilli	o__Lactobacillales	f__Carnobacteriaceae	unknown	unknown	0.02
151	k__Bacteria	p__Firmicutes	c__Bacilli	o__Lactobacillales	f__Lactobacillaceae	g__Lactobacillus	s__paralimentarius	0.12
157	k__Bacteria	p__Firmicutes	c__Bacilli	o__Lactobacillales	f__Streptococcaceae	g__Lactococcus	s__garvieae	0.11
308	k__Bacteria	p__Proteobacteria	c__Gammaproteobacteria	o__Enterobacteriales	f__Enterobacteriaceae	g__Citrobacter	unknown	0.22
309	k__Bacteria	p__Proteobacteria	c__Gammaproteobacteria	o__Enterobacteriales	f__Enterobacteriaceae	g__Citrobacter	unknown	0.68
322	k__Bacteria	p__Proteobacteria	c__Gammaproteobacteria	o__Pasteurellales	f__Pasteurellaceae	g__Mannheimia	unknown	0.03
342	k__Bacteria	p__Proteobacteria	c__Gammaproteobacteria	o__Vibrionales	f__Pseudoalteromonadaceae	g__Pseudoalteromonas	unknown	0.05
CSB = Comisana sheep breed		LSB = Lacaune sheeep breed
Ch = cheese

## Sheet: Table S7
Table S7. ID, taxonomic affiliation, and microbial categories of curd-cheese shared OTUs.
Panel A: CSB datasets
OTUs ID	Kindom	Phylum	Class	Order	Family	Genus	Species	Microbial Categories	OTUs %
									CSB_Cu	CSB_Ch
127	k__Bacteria	p__Firmicutes	c__Bacilli	o__Bacillales	f__Staphylococcaceae	g__Staphylococcus	unknown	SP/P	0.06	0.01
315	k__Bacteria	p__Proteobacteria	c__Gammaproteobacteria	o__Enterobacteriales	f__Enterobacteriaceae	g__Serratia	unknown	SP	4.31	36.36
337	k__Bacteria	p__Proteobacteria	c__Gammaproteobacteria	o__Pseudomonadales	f__Pseudomonadaceae	g__Pseudomonas	s__fragi	SP	80.5	3.18
Panel B: LSB datasets
OTUs ID	Kindom	Phylum	Class	Order	Family	Genus	Species	Microbial Categories	OTUs %
									LSB_Cu	LSB_Ch
23	k__Bacteria	p__Actinobacteria	c__Actinobacteria	o__Actinomycetales	f__Micrococcaceae	g__Kocuria	unknown	O	0.05	0.01
34	k__Bacteria	p__Actinobacteria	c__Actinobacteria	o__Bifidobacteriales	f__Bifidobacteriaceae	unknown	unknown	LAB	0.33	0.38
79	k__Bacteria	p__Bacteroidetes	c__Flavobacteriia	o__Flavobacteriales	f__Flavobacteriaceae	g__Flavobacterium	s__frigidarium	SP	37.62	0.33
82	k__Bacteria	p__Bacteroidetes	c__Flavobacteriia	o__Flavobacteriales	f__[Weeksellaceae]	g__Chryseobacterium	unknown	SP	2.37	0.16
84	k__Bacteria	p__Bacteroidetes	c__Flavobacteriia	o__Flavobacteriales	f__[Weeksellaceae]	g__Wautersiella	unknown	SP	1.16	0.18
114	k__Bacteria	p__Firmicutes	c__Bacilli	o__Bacillales	f__Listeriaceae	g__Brochothrix	unknown	SP	1.36	0.01
122	k__Bacteria	p__Firmicutes	c__Bacilli	o__Bacillales	f__Planococcaceae	unknown	unknown	O	1.27	0.40
126	k__Bacteria	p__Firmicutes	c__Bacilli	o__Bacillales	f__Staphylococcaceae	g__Macrococcus	unknown	SP/P	0.05	0.2
127	k__Bacteria	p__Firmicutes	c__Bacilli	o__Bacillales	f__Staphylococcaceae	g__Staphylococcus	unknown	SP/P	1.59	1.32
139	k__Bacteria	p__Firmicutes	c__Bacilli	o__Lactobacillales	f__Carnobacteriaceae	g__Carnobacterium	unknown	SP	0.16	0.41
141	k__Bacteria	p__Firmicutes	c__Bacilli	o__Lactobacillales	f__Enterococcaceae	g__Enterococcus	unknown	LAB	0.16	0.11
144	k__Bacteria	p__Firmicutes	c__Bacilli	o__Lactobacillales	f__Lactobacillaceae	unknown	unknown	LAB	0.12	0.45
145	k__Bacteria	p__Firmicutes	c__Bacilli	o__Lactobacillales	f__Lactobacillaceae	g__Lactobacillus	unknown	LAB	0.62	7.36
147	k__Bacteria	p__Firmicutes	c__Bacilli	o__Lactobacillales	f__Lactobacillaceae	g__Lactobacillus	s__brevis	LAB	0.16	0.54
155	k__Bacteria	p__Firmicutes	c__Bacilli	o__Lactobacillales	f__Leuconostocaceae	g__Leuconostoc	s__mesenteroides	LAB	0.46	10.51
158	k__Bacteria	p__Firmicutes	c__Bacilli	o__Lactobacillales	f__Streptococcaceae	g__Streptococcus	unknown	LAB	0.06	1.74
160	k__Bacteria	p__Firmicutes	c__Bacilli	o__Lactobacillales	f__Streptococcaceae	g__Streptococcus	s__agalactiae	LAB	0.07	0.04
161	k__Bacteria	p__Firmicutes	c__Bacilli	o__Lactobacillales	f__Streptococcaceae	g__Streptococcus	s__minor	LAB	0.06	0.04
271	k__Bacteria	p__Proteobacteria	c__Betaproteobacteria	o__Burkholderiales	f__Comamonadaceae	g__Comamonas	unknown	SP	5.47	0.02
285	k__Bacteria	p__Proteobacteria	c__Betaproteobacteria	o__Neisseriales	f__Neisseriaceae	g__Microvirgula	s__aerodenitrificans	O	0.12	0.01
295	k__Bacteria	p__Proteobacteria	c__Epsilonproteobacteria	o__Campylobacterales	f__Campylobacteraceae	g__Arcobacter	unknown	SP	0.24	0.01
304	k__Bacteria	p__Proteobacteria	c__Gammaproteobacteria	o__Alteromonadales	f__Shewanellaceae	g__Shewanella	unknown	SP	0.12	0.01
310	k__Bacteria	p__Proteobacteria	c__Gammaproteobacteria	o__Enterobacteriales	f__Enterobacteriaceae	g__Enterobacter	unknown	SP	0.11	0.05
314	k__Bacteria	p__Proteobacteria	c__Gammaproteobacteria	o__Enterobacteriales	f__Enterobacteriaceae	g__Rahnella	s__aquatilis	SP	1.06	0.04
324	k__Bacteria	p__Proteobacteria	c__Gammaproteobacteria	o__Pseudomonadales	f__Moraxellaceae	g__Acinetobacter	unknown	SP	1.90	0.17
325	k__Bacteria	p__Proteobacteria	c__Gammaproteobacteria	o__Pseudomonadales	f__Moraxellaceae	g__Acinetobacter	s__guillouiae	SP	1.52	0.12
326	k__Bacteria	p__Proteobacteria	c__Gammaproteobacteria	o__Pseudomonadales	f__Moraxellaceae	g__Acinetobacter	s__johnsonii	SP	6.67	1.16
328	k__Bacteria	p__Proteobacteria	c__Gammaproteobacteria	o__Pseudomonadales	f__Moraxellaceae	g__Enhydrobacter	unknown	SP	3.93	0.04
349	k__Bacteria	p__Proteobacteria	c__Gammaproteobacteria	o__Xanthomonadales	f__Xanthomonadaceae	g__Stenotrophomonas	s__acidaminiphila	SP	0.17	0.01
Cu = curd; Ch = cheese
CSB = Comisana sheep breed		LSB = Lacaune sheeep breed

## Sheet: Table 8
Table S10. ID and taxonomic affiliation of cheese shared OTUs.
OTUs ID	Kindom	Phylum	Class	Order	Family	Genus	Species	OTUs %
								CSB_Ch	LSB_Ch
145	k__Bacteria	p__Firmicutes	c__Bacilli	o__Lactobacillales	f__Lactobacillaceae	g__Lactobacillus	__	0	7.36
155	k__Bacteria	p__Firmicutes	c__Bacilli	o__Lactobacillales	f__Leuconostocaceae	g__Leuconostoc	s__mesenteroides	2.38	10.51
156	k__Bacteria	p__Firmicutes	c__Bacilli	o__Lactobacillales	f__Streptococcaceae	g__Lactococcus	s__	54.22	67.16
315	k__Bacteria	p__Proteobacteria	c__Gammaproteobacteria	o__Enterobacteriales	f__Enterobacteriaceae	g__Serratia	s__	36.36	0.03
337	k__Bacteria	p__Proteobacteria	c__Gammaproteobacteria	o__Pseudomonadales	f__Pseudomonadaceae	g__Pseudomonas	s__fragi	3.18	0
Ch = cheese
CSB = Comisana sheep breed		LSB = Lacaune sheeep breed
